1 Sequence analysis and confirmation of type IV pili-associated proteins

2 PiLY1, PilW and PilV in *Acidithiobacillus thiooxidans*

3

4 Type IV pili-associated proteins PiLY1, PilW and PilV in *Acidithiobacillus thiooxidans*

5

6 Elvia Alfaro-Saldaña<sup>1,2</sup>, Araceli Hernández-Sánchez<sup>2</sup>, O. Araceli Soberano-Patrón<sup>3</sup>,

7 Marizel Astello-García<sup>1</sup>, J. Alfredo Méndez-Cabañas<sup>2</sup>, J. Viridiana García-Meza<sup>1\*</sup>

8

9

10

11 <sup>1</sup> Geomicrobiología, Metalurgia, Universidad Autónoma de San Luis Potosí, San  
12 Luis Potosí, México

13 <sup>2</sup> Biofísica Molecular, Instituto de Física, Universidad Autónoma de San Luis Potosí,  
14 San Luis Potosí, México

15 <sup>3</sup> División de Biología Molecular, Instituto Potosino de Investigación Científica y  
16 Tecnológica, San Luis Potosí, México

17

18

19 \* Corresponding author

20 E-mail: [jvgm@uaslp.mx](mailto:jvgm@uaslp.mx) (JVGM)

21 JVGM is senior author

22

## 23 **Abstract**

24 *Acidithiobacillus thiooxidans* is an acidophilic chemolithoautotrophic bacterium  
25 widely used in the mining industry due to its metabolic sulfur-oxidizing capability. The  
26 biooxidation of sulfide minerals is enhanced through the attachment of *A. thiooxidans*  
27 cells to the mineral surface. The Type IV pili (TfP) of *At. thiooxidans* may play an  
28 important role in the bacteria attachment, since among other functions, TfP play a  
29 key adhesive role in the attachment to and colonization of different surfaces. In this  
30 work, we reported for the first time the confirmed mRNA sequences of three TfP  
31 proteins from *At. thiooxidans*, the protein PilY1 and the TfP pilins PilW and PilV. The  
32 nucleotide sequences of these TfP proteins show changes of some nucleotide  
33 positions with respect to the corresponding annotated sequences. The bioinformatic  
34 analyses and 3D-modeling of protein structures sustain their classification as TfP  
35 proteins, as structural homologs of the corresponding proteins of *P. aeruginosa*,  
36 results that sustain the role of PilY1, PilW and PilV in pili assembly. Also, that PilY1  
37 comprises the conserved *Neisseria*-PilC (superfamily) domain of the tip-associated  
38 adhesin, while PilW of the superfamily of putative TfP assembly proteins and PilV  
39 belongs to the superfamily of TfP assembly protein. Also, the analyses suggested  
40 the presence of specific functional domains involved in adhesion, energy  
41 transduction and signaling functions. The phylogenetic analysis indicated that the  
42 PilY1 of *Acidithiobacillus* genus forms a cohesive group linked with iron- and/or  
43 sulfur-oxidizing microorganisms from acid mine drainage or mine tailings. This work

44 enriches knowledge regarding colonization, adhesion and biooxidation of inorganic

45 sulfurs by *A. thiooxidans*.

46

## 47 Introduction

48 *Acidithiobacillus thiooxidans* is an acidophilic chemolithoautotroph that uses reduced  
49 sulfurs as a source of electrons and reducing power, including elemental sulfur ( $S^0$ ),  
50 polysulfides ( $S_n^{2-}$ ) and sulfide minerals, such as pyrite ( $FeS_2$ ), chalcopyrite ( $CuFeS_2$ )  
51 or sphalerite ( $ZnS$ ).

52 Bacterial attachment to mineral surfaces influences the rate of dissolution of the  
53 mineral because of surficial phenomena: Mixed potential decreases, changes in  
54 kinetics and mass-transport processes [1]. Accordingly, bacterial attachment is due  
55 to self-organization by a bioelectrochemical evolution on the interface. Interfacial  
56 studies on charge and mass transfer demonstrate that  $S^0$  biooxidation by *At.*  
57 *thiooxidans* begins in the early stages of interaction (1 to 24 h) when the biofilm is  
58 not constituted, and it is primarily controlled by surficial characteristics that pivoted  
59 the bacterial attachment to the hydrophobic  $S^0$ ; such attachment is an energy-  
60 dependent process in which *At. thiooxidans* essentially activates or modifies the  
61 reactive properties of  $S^0$  [2, 3]. The hydrophobic character of the interface  
62 “determines the free energy of the adhesion process” [4]. The Type IV pili (TfP) of  
63 *At. thiooxidans* may play an important role in the bacterial attachment and  
64 bioelectrochemical evolution on the bacteria-mineral interface, e.g., surpassing  
65 hydrophilic interactions.

66 Valdés *et al.* [5] and Li *et al.* [6] suggested that the efficiency of *At. ferrooxidans* to  
67 attach and colonize mineral surfaces (e.g.,  $FeS_2$  or  $CuFeS_2$ ) and solid reduced sulfur  
68 depends on TfP as well as its multiple copies of genes for pili biosynthesis. Other

69 *Acidithiobacillus* species such as *At. caldus* and *At. thiooxidans* contain genes  
70 coding for TfP assembly proteins [7-9] that are related to biofilm formation, acting as  
71 c-di-GMP effector proteins [10].

72 The TfP are semiflexible polymeric filaments of pilins anchored to the cellular  
73 membrane, of 5-7 nm diameter and from 4-5  $\mu\text{m}$  up to several micrometers in length  
74 [11,12]. The TfP have been grouped based on the aminoacidic homology of the pilin  
75 subunits, which are relatively conserved in prokaryotes. Pilins share an N-terminal  
76 cleavage/methylation (N-methylphenylalanine) domain (NTD) of approximately 25  
77 amino acids (aa) followed by a stretch of hydrophobic residues forming an extended  
78  $\alpha$ -helix and a disulfide bond at the C-terminal domain (CTD) [11, 13]. Pilins interact  
79 via their conserved NTD  $\alpha$ -helix, which forms a hydrophobic core that provides  
80 extreme mechanical strength [13]. Further, it has been reported that this conserved  
81 NTD in prepilins is also in the type II secretion systems (T2SS), known as  
82 pseudopilins [14-17].

83 Pelicic [18] suggested that the minimal machinery needed for TfP assembly includes  
84 pilins and other TfP proteins: (i) Major pilin with NTD (pilin-like motif), (ii) specific  
85 peptidase that processes the precursors of pilins or prepilins (e.g., the PilD of  
86 *Neisseria* spp.), (iii) traffic ATPase that powers TfP assembly (PilT), (iv) internal inner  
87 membrane protein (PilG), (v) integral outer membrane or secretin necessary for the  
88 emergence of TfP on the cell surface (PilQ), and (vi) proteins also found in T2SS,  
89 the pilin-like proteins.

90 Interesting, “the TFPs are universal in prokaryotes and have shown extreme  
91 **functional** versatility”. Among other **functions** (motility, cell signaling, pathogenic  
92 functions, protein secretion, DNA uptake, electrical conductance, and so on), TFP  
93 are “sticky organelles” Berry and Pelicic [17] that play a key role as adhesive to stick  
94 bacteria to one another and to attach to and to colonize to a wide variety of surfaces,  
95 leading to the formation of colonies and even biofilms with cells embedded within an  
96 EPS matrix, including “2-D” (thin liquid) and 3-D biofilms [12, 17].

97 The adhesive ability of TFP is due to the presence of a non-pilin protein, an adhesin  
98 (integrin) located on the distal tip of the TFP [17, 19-21]. This adhesin, designated  
99 PilC or PilY1, is expressed in multiple species. For instance, PilY1 of *Pseudomonas*  
100 *aeruginosa* is the orthologue of the meningococcal PilC of *Neisseria gonorrhoeae*,  
101 and both proteins Although PilY1 and PilC share partial sequence homology, they  
102 have a high degree of structural similarity [22, 23]. PilC is a phase-variable protein  
103 that belongs to a Conserved Protein Domain Family of several PilC protein  
104 sequences [23]. Further, PilC/PilY1 is dispensable for TFP assembly at early stages  
105 of TFP biogenesis, for instance, in the absence of pilus retraction [17, 22-24]. Our  
106 previous analysis on, showed that the tip-associated adhesin PilY1 of *At. thiooxidans*  
107 Licanantay (WP\_031573362] exhibited 55% and 86% identity with the type IV pilin  
108 biogenesis protein of *At. thiooxidans* ATCC 19377 (WP\_010638975.1) and of *At.*  
109 *albertensis* (WP\_075322776.1), respectively.

110 Other proteins involved in adhesion are the minor but highly conserved pilin proteins  
111 PilW and PilV of *Neisseria* spp. [17, 24, 25]. The outer-membrane lipoprotein PilW

112 participates in pilus biogenesis for the stabilization of the pilus but not for their  
113 assembly, as well as to allow bacterial adherence [26]. Another possible function for  
114 PilW is the transfer of electrons, as has been proposed for *At. ferrooxidans* [27] and  
115 other species with Tfp [28].

116 Thus, the putative proteins PilY1, PilW and PilV of *At. thiooxidans* were examined in  
117 this work. We chose these proteins because of PilY1's possible function as an  
118 adhesin and the role of PilW and PilV as pilus assembly proteins (structural pilins)  
119 of the Tfp of *At. thiooxidans*. Most genes of *At. thiooxidans* are annotated in  
120 GenBank. In this study, the sequences of the Tfp proteins PilY1, PilW and PilV were  
121 first confirmed and uploaded to GenBank. In addition, bioinformatic analyses and 3-  
122 D modeling of each Tfp protein were performed.

123

## 124 **Materials and methods**

### 125 ***Acidithiobacillus thiooxidans* culture and maintenance**

126 *At. thiooxidans* strain ATCC 19377 was cultured in ATCC 125 medium (in g/L: 0.4  
127 (NH<sub>4</sub>)<sub>2</sub>SO<sub>4</sub>, 0.5 MgSO<sub>4</sub>·7H<sub>2</sub>O, 0.25 CaCl<sub>2</sub>, 3 KH<sub>2</sub>PO<sub>4</sub>, 0.005 FeSO<sub>4</sub>·7H<sub>2</sub>O, and 10  
128 S<sup>0</sup>, pH 2.0 adjusted with concentrated H<sub>2</sub>SO<sub>4</sub>). Cultures were aerobically incubated  
129 at 29 ± 1 °C under orbital agitation (110 to 120 rpm) for 5, 10, 15 and 21 days.

## 130 **Multiplex PCR and cDNA sequencing of *pilY1*, *pilW*, and**

## 131 ***pilV***

132 We used the *At. thiooxidans* ATCC 19377 T draft genome AFOH01000001 originally  
133 described by Valdés et al. [7]. The annotated protein sequence of PilY1, PilW and  
134 PilV as well as the 16S ribosomal subunit with the accession numbers  
135 WP\_010638975.1, WP\_010638981.1, WP\_010638979.1 and AJ459803,  
136 respectively, were. Primers were designed against conserved regions of the putative  
137 sequences of *pilY1* (ATHIO\_RS0106065), *pilW* (ATHIO\_RS0106075) and *pilV*  
138 (ATHIO\_RS0106080) using the software Primer3 [29] and Vector NTI (InforMax-  
139 Invitrogen, USA). As a positive control for each PCR reaction, we designed a pair of  
140 primers that amplified the 16S rRNA.

141 Samples for RNA extraction were extracted after 5, 10, 15 and 21 days. At these  
142 timepoints, cells were collected by centrifugation at 0.08 x g to separate the cells  
143 from S<sup>0</sup>; cells were concentrated and washed by centrifugation at 21.1 x g for 1 min  
144 using saline phosphate buffer (PBS; in g/L: 8 NaCl, 1.44 Na<sub>2</sub>HPO<sub>4</sub>, 0.24 KH<sub>2</sub>PO<sub>4</sub>  
145 (J.T. Baker, USA), and 0.2 KCl (Sigma-Aldrich, USA); pH 7.4).

146 RNA extraction was performed using TRIzol (Invitrogen, USA) reagent according the  
147 manufacturer's protocol. After quantification using a NanoDrop 2000c (Thermo  
148 Scientific, USA), cDNA synthesis was performed according to the manufacturer's  
149 recommendation, using 200U M-MLV (Invitrogen, USA) in a 20 µL total volume  
150 reaction. The amplification products were purified using the QIAquick kit (Qiagen,  
151 USA) following the recommended procedure, quantified and sequenced. The



152 products were sequenced by the Sanger method at LANBAMA (National Laboratory  
153 of Biotechnology, San Luis Potosí, Mexico) and LANGEBIO (National Laboratory of  
154 Genomic for the Biodiversity, Guanajuato, México) facilities. Each sequence was  
155 confirmed at least five times by analyzing amplification products obtained from  
156 different culture replicates. The generated sequences were compared with the  
157 annotated sequences of each corresponding gene using the Multalin software [30].

## 158 **In silico (bioinformatic) analyses of proteins**

159 The confirmed sequences of PilY1, PilW and PilV were analyzed to search for  
160 domains, families and functional sites with bioinformatic tools, including Simple  
161 Modular Architecture Search, SMART [31], PROSITE [32], and EMBL-EBI [33] and  
162 the CDD/SPARCLE domain analysis function [34]. The protein structure homology-  
163 modeling was achieved by using the server SWISS-MODEL [35]. The 3-D model of  
164 each protein was generated in I-TASSER [36, 37]]. The analyses of possible ligands  
165 were performed in the Ligand-Protein Binding Database, BioLip [38].

## 166 **Phylogenetic relationships**

167 Phylogenetic relationships were analyzed for the confirmed nucleotide and protein  
168 sequences of PilY1, PilW and PilV from *At. thiooxidans* ATCC19377 against those  
169 of the NCBI database using BLASTN 2.8.0+ [39, 40], and UniProt [41] bioinformatic  
170 resources.

171 The sequences obtained from NCBI were aligned with those obtained in this work  
172 using MEGA7 software [42] by the Neighbor-Joining method. Thus, the evolutionary

173 history was inferred by using the Maximum Likelihood method (ML) based on the  
174 Jones-Taylor Thornton (JTT) model [43]; for the bootstrap consensus tree, 500  
175 replicates were performed [44]. The percentage of trees in which the associated taxa  
176 clustered together is shown next to the branches. Initial trees for the heuristic search  
177 were obtained automatically by applying Neighbor-Join and BioNJ algorithms to a  
178 matrix of pairwise distances estimated using a JTT model; the tree with the highest  
179 log likelihood is shown. All positions with less than 95% site coverage were  
180 eliminated.

## 181 **Transmission electron microscopy (TEM) analyses**

182 After 4 days of incubation, *A. thiooxidans* cells were negative stained with 1%  
183 phosphotungstic acid (PTA) or 2% uranyl acetate. One aliquot was directly used,  
184 and the other was fixed previously to reduce the insoluble S<sup>0</sup> present in the sample  
185 and stabilize pili. Both samples were washed three times at 1500 rpm for 5 min and  
186 stained with PTA. The pili were observed in TEM (JEOL 200 CX, Japan) at 100 kV.

## 187 **Results and Discussion**

### 188 **TEM analyses**

189 After the microscopic analyses, we identified pili in all tested conditions (Fig 1a): i)  
190 Negative staining with 2% uranyl made the flagellum, pili, and S<sup>0</sup> visible; ii) Upon  
191 negative staining with 1% PTA, the pili and flagellum were surrendered by  
192 extracellular polymeric substance; iii) *A. thiooxidans* were previously washed to  
193 remove S<sup>0</sup> from the medium, then stained with 1% PTA, although S<sup>0</sup> was eliminated,

194 and many flagella and pili were lost as well. We fixed the bacteria before washing,  
195 and in this condition, we preserved the pili, arranged in a pili network (iv, insert).

196

197 **Figure 1. Representative micrographs and multiplex PCR amplification**  
198 **products of *pilY1*, *pilW*, and *pilV*.**

199 The TEM microphotographs of *At. thiooxidans* showed the pili (triangles) and flagella  
200 (arrows) (a). The multiplex PCR was obtained after 5 days of culture; the positive  
201 control corresponds to a region of 598 bp of the rRNA 16S (b).

202

## 203 **Sequence analyses**

204 For the sequencing of *pilY1*, *pilW* and *pilV*, primers were designed against conserved  
205 regions of the putative sequences of 16S from *At. thiooxidans* (GenBank  
206 NZ\_AFOH01000047.1; [7]). Due to its size (3499 bp), we identified conserved regions  
207 of the annotated sequence of *pilY1* comparing it with its homologue in *At.*  
208 *ferrooxidans* strain ATCC 53993 (WP\_064218310.1), according to the BLAST  
209 analysis. The eight pairs of primers designed (*pilY-1* to *pilY-8*; S2 Table) were used  
210 to amplify, purify and sequence (per triplicate) each PCR product of such regions;  
211 each obtained amplicon was aligned against the annotated sequence of the *pilY1*  
212 gene (ATHIO\_RS0106065) to highlight changes between them. After analyzing each  
213 sequenced amplicon, the complete sequence was rejoined, and new pairs of primers  
214 were designed (*pilY-9* to *pilY-11*, S2 Table) to assess if the highlighted changes were

215 *bonafide*; each pair of these three primers initiates just in the regions with the most  
216 significant insertions and deletions previously found. The new obtained amplicons  
217 were individually aligned against their corresponding fragment of the reassembled  
218 sequence and then with the annotated sequence of *At. thiooxidans*.

219 A similar strategy was performed for the sequencing of *pilW* and *pilV*, using 5 and 4  
220 pairs of designed primers, respectively (S2 Table); the obtained amplicons were  
221 compared with the corresponding annotated sequence of *pilW* (ATHIO\_RS0106075)  
222 and *pilV* (ATHIO\_RS0106080)

223 Once the complete sequences were obtained, the expression of *pilY1*  
224 (MH021598.1), *pilW* (MH021599.1) and *pilV* (MH021600.1) was evaluated at  
225 different culture times (Fig 1b).

226 Thus, the nucleotide sequences of *pilY1*, *pilW* and *pilV* show changes at some  
227 nucleotide positions with respect to the corresponding annotated sequences (S1  
228 Table). The changes are more significant for *pilY1* mainly within the N-terminal 1560  
229 bp region. In this region, the difference between the annotated and the confirmed  
230 sequences is approximately 25% due to changes of some bases as well as  
231 insertions and deletions of 25 and 7 nucleotides, respectively. In the second half of  
232 the sequence (1991 bp), the differences between both annotated and confirmed  
233 sequences is just 3% due to two insertions of six nucleotides in the confirmed  
234 sequence.

235 However, annotated and confirmed protein sequences showed a pairwise distance  
236 of 0.13 (Fig 2a). The PilY1 (AWP39905.1) sustains 85% identity (1007 identical

237 position) with the annotated WP\_010638975.1 reported in GenBank. According to  
238 BLAST analysis, PilY1 (AWP39905.1) sustains 99% and 77% identity with the  
239 sequence of the type IV pilin biogenesis protein of *At. thiooxidans*  
240 (WP\_065968128.1) and the hypothetical protein of *At. ferrooxidans*  
241 (WP\_064218310.1); these sequences comprise the *Neisseria*-PilC superfamily  
242 domain [34].

243

244 **Figure 2. Comparison between the confirmed and annotated sequences.**

245 (a) PilY1 AWP39905.1 and WP\_010638975.1, (b) PilW AWP39906.1 and  
246 WP\_010638979.1 and (c) PilV AWP39907.1 and WP\_010638981.1, by multiple  
247 sequence alignment accuracy and high throughput (MUSCLE) and toggling  
248 conserved sites at 100% level (in colors); computed pairwise distance (Poisson  
249 model) is also shown. Analyses were done in MEGA7 [42].

250

251 Although *pilW* (MH021599.1) shows 20 synonymous changes, the protein sequence  
252 (AWP39906.1) shows 98% identity against the annotated and translated sequence  
253 of the prepilin-type N-terminal cleavage/methylation domain-containing protein,  
254 WP\_010638979.1 (ATHIO\_RS0106075; Fig 2b). Both sequences comprise a region  
255 of 132 aa, the PilW superfamily of putative Tfp assembly proteins, as well as *At.*  
256 *ferrooxidans* ATCC 23270 (WP\_064218312.1; 83% identity with *At. thiooxidans*  
257 AWP39906.1).

258 Finally, the *pilV* sequence of (MH021600.1) exhibited three synonymous changes  
259 that resulted in an identical protein to the annotated and translated  
260 WP\_010638981.1 (Fig 2c). PilV (AWP39907.1) belongs to the PilV super family of  
261 Tfp assembly protein, an extracellular structure involved in cell motility [34]. Blast  
262 analysis for PilV (AWP39907.1) indicated 92% identity with the pilin (putative) of *At.*  
263 *ferrooxidans* ATCC 23270 (ACK80286.1).

264

## 265 **Proteins bioinformatic analyses and phylogenetic trees**

### 266 **PilY1**

267 The bioinformatic analyses of PilY1 (AWP39905.1) confirm that it is a non-pilin  
268 protein, essentially hydrophilic (gravy -0.081), and its last 462 aa (48.19 kDa region  
269 715-1176 aa) shares sequence and structural homologies with the C-terminal  
270 domain (CTD) of PilY1 of *Ps. aeruginosa* (3hx6.1) [23] that belongs to the conserved  
271 domain *Neisseria*-PilC superfamily [34]. In contrast, the NTD of PilC of *Neisseria*  
272 spp., PilY1 of *P. aeruginosa* and the PilY1 reported in this work are non-conserved,  
273 divergent sequences. Both NTD and CTD sequences of the *At. thiooxidans* PilY1  
274 share similarities with the Tfp biogenesis protein of *Acidithiobacillus* spp. (Fig 3).

275

276 **Figure 3. Multiple sequence alignment of PilY1 (AWP39905.1) of *At.***  
277 ***thiooxidans*.**

278 Showing two regions: (a) part of the vWA domain within the NTD of some  
279 *Acidithiobacillus* spp. showing the MIDAS (DxSxS) motif, and (b) the PQQ domain  
280 with the functional motif LYxxxxxG within the CTD of some *Acidithiobacillus* spp. and  
281 other bacteria with PilY1/PilC.

282

283 The previous is evidenced in the phylogenetic tree (Fig 4), wherein the  
284 *Acidithiobacillus* genus forms a cohesive group, deeply related with iron- and/or  
285 sulfur-oxidizing microorganisms from acid mine drainage (AMD) or mine tailings  
286 such as *Th. bhubaneswarensis*, *Ac. thiooxydans*, *Ga. acididurans*, *Sulfuriferula* sp.,  
287 and those of the AMD metagenome [45-49]. This phylogenetic tree also reveals that  
288 PilY1 and PilC are homologues; all the analyzed sequences comprise the *Neisseria*-  
289 PilC beta-propeller domain. Thus, the phylogenetic analysis of PilY1/PilC suggests  
290 homologating the nomenclature of this Tfp protein (Fig 4), perhaps as the *Neisseria*  
291 spp. pilus assembly/adherence protein PilC.

292

#### 293 **Figure 4. Molecular phylogenetic analysis of PilY1 (AWP39905.1).**

294 The evolutionary history obtained by ML (log likelihood: -8108.55) of PilY1/PilC,  
295 using 21 aa sequences and the PilY1 (AWP39905.1). There were 212 positions in  
296 the final dataset. Evolutionary analyses were conducted in MEGA7 [42]. The aa  
297 sequences used for alignment and phylogenetic tree were derived from: acid mine  
298 drainage (AMD) metagenome (CBI05240.1), *A. warmingii* DSM 173 (SDX64909.1),  
299 *Acidiferrobacter thiooxydans* ZJ (OCX45123.1), *At. albertensis* DSM 14366  
300 (WP\_075322776), *At. caldus* ATCC 51756 (AIA55059.1 and WP\_064306242.1), *At.*

301 *ferrivorans* YL15 (WP\_085537817.1), *At. ferrooxidans* ATCC 23270 (ACK78377.1)  
302 *At. ferrooxidans* ATCC 53993 (ACH83324.1), *At. thiooxidans* (WP\_010638975.1) *At.*  
303 *thiooxidans* Licanantay (WP\_031573362.1), *Ga. acididurans* (isolate ShG14-8;  
304 KXS31914.1), *Ge. sulfurreducens* KN400 (ADI84872.2), *Methyloglobulus morosus*  
305 KoM1 (ESS74050.1); *Ns. meningitidis* (WP\_101069668.1), *Nitrosomoas communis*  
306 Nm110 (SDW55994.1), *Ps. aeruginosa* PAO1 (AAA93502.1), *Rhodoferax* sp.  
307 DCY110 (WP\_076201095.1), PilC of *Sulfuriferula* sp. AH1 (WP\_087447088.1), *Te.*  
308 *thermophilus* JCM 19170 (CUB07558.1), *Th. bhubaneswarensis* DSM 18181  
309 (CUA94317.1), *Thiorhodococcus drewsii* AZ1 (EGV31806.1). Tfp: type IV pilin.

310

311 Our results are consistent with the predicted 3-D model of *At. thiooxidans* PilY1  
312 (AWP39905.1; Fig 5). This model was generated by I-TASSER based on structures  
313 from the PDB (5j44A, 3hx6, 6emkA, 3ja4A and 3iyIW), highlighting the PilY1 CTD  
314 structure of *P. aeruginosa* (3hx6A and 3hx6) [23]. According to the homology-  
315 modeling, PilY1 of *At. thiooxidans* (AWP39905.1) showed similarity (22.73%) with such  
316 PilY1 of *P. aeruginosa*, mainly among the CTD that corresponds to the *Neisseria*-PilC  
317 beta-propeller domain of the tip-associated adhesin PilY1.

318

### 319 **Figure 5. 3-D models of the non-pilin protein PilY1 (AWP39905.1).**

320 The model shown has a TM-score of  $0.61 \pm 0.14$  with *Ps. aeruginosa* (TM-score >0.5  
321 indicates a correct topology model, while TM-score <0.17 indicates a random  
322 similarity) (a). A region of vWA showing the binding ligands L156, Y156, Y-319 and



323 T-320 of MIDAS, for Ca<sup>2+</sup> binding (**b** and **b'**). a region CTD of PilY1/PilC (TM-score  
324 of 0.62±0.14) showing the binding residues for carbohydrates (e.g., α-D-glucose, β-  
325 glucose, α-dextrose) by S-754, L-774, G-776, M-778, D-834, L-835, Q-836, L-837  
326 (**c** and **c'**); 3-D modeling conducted in I-TASSER [36, 37] and BioLip [38]. Model of  
327 the PQQ region predicted by homology [35] and the anchor motif LYxxxxTG (**d** and  
328 **d'**).

329

330 *At. thiooxidans* PilY1 (AWP39905.1) bioinformatic analysis confirmed the presence  
331 of five regions or motifs (Figs 3 and 5) also found in TfP proteins from *At. ferrivorans*  
332 SS3 (WP\_085537817.1), *At. ferrooxidans* ATCC 53993 (ACH83324.1), *At. albertis*  
333 (WP\_075322776), *At. caldus* MTH-04 (WP\_064306242.1), and *At. thiooxidans*  
334 Licanantay (WP\_031573362):

335 (i) A von Willebrand factor type A (vWA) domain (540 aa) was found in the region  
336 from amino acid 42 to 581, folded into a α/β Rossmann fold (alternating β-strand  
337 with α-helix). Cellular functions such as cell migration, adhesion and signaling have  
338 been associated with the vWA domain [34, 50]. E-value (BLAST):1x10<sup>-28</sup>.

339 (ii) Within the vWA, a metal ion-dependent adhesion sites (MIDAS motif, for Mn<sup>2+</sup>, Mg<sup>2+</sup>  
340 or Ca<sup>2+</sup>) of 35 aa residues (region 153-187) folded as a short coil followed by an α-  
341 helix. MIDAS are commonly present in cell surface-adhesion receptors or molecules  
342 (CAMs), e.g., integrins [51]; thus, such components are involved in cell-cell and cell-  
343 matrix interactions through its adhesion function. MIDAS comprised the conserved  
344 components DxSxS, T, and D (Fig 3a) [34, 52]. Modeling by homology [35], the

345 MIDAS motif of *A. thiooxidans* PilY1 (AWP39905.1) exhibited 34.38% similarity  
346 (covering 91%, from 2 to 33 aa) with the model of a cell wall surface anchor family  
347 protein (PDB: 3tw0.1.A), specifically with the adhesive tip pilin of *Streptococcus*  
348 *agalactiae* [50]. The constructed 3-D model specifies that the MIDAS motif within  
349 vWA includes two different loops ( $\alpha$ -helix) exposed in the protein surface (Fig 5b and  
350 b'), a location that allows it to interact with divalent metal ions such as  $\text{Ca}^{2+}$  via the  
351 binding ligands I-154, N-156 and T-320 of MIDAS.

352 (iii) The aforementioned conserved CTD or *Neisseria*-PilC domain is 462 aa (715-  
353 1176 aa) mainly composed by aliphatic aa (G, A, V, L and S, T; 60.2%) and slightly  
354 hydrophilic (gravy: -0.094). The 3-D model of this CTD (Fig 5c) was based only on  
355 structures of the CTD of *P. aeruginosa* PilY1, 3hx6 [23], showing a normalized Z-  
356 score of the threading alignments, up to 7.52. Other structural analogs predicted  
357 using I-TASSER, are oxidoreductases -substrate oxidation and electron transfer  
358 (PDB: 1h4jE, 1lrwA, 2d0vI, 1yiqA1, 1FLG), with  $\text{Ca}^{2+}$  or pyrroloquinoline quinone  
359 (PQQ) as ligands (see below).

360 (iv) Within the *Neisseria*-PilC domain, the 3-D model also predicts binding sites for  
361 carbohydrates such as glucose (Fig 5c), previously described for tail-spike proteins  
362 for recognition and adhesion of *Salmonella* and *E. coli* bacteriophage HK620 [53].

363 (v) Also within the *Neisseria*-PilC domain is a motif that occurs in propellers of PQQ  
364 cofactor binding domains (SMART and InterPro accession numbers SM00564 and  
365 IPR018391, respectively) of 27 aa (region 926-952) that catalyzes redox reactions;  
366 e.g., a  $\beta$ -propeller repeat occurring in enzymes with PQQ as cofactor in prokaryotic

367 quinoprotein dehydrogenases that are involved in electron transfer processes, and  
368 thus energy transduction [54]. *Ps. aeruginosa* PilY1 (AAA93502) and PilC of *N.*  
369 *meningitidis* 22404 (WP\_101069668) also include the PQQ cofactor binding  
370 domain, while most of the *Acidithiobacillus* spp. and other sulfur-oxidizing  
371 microorganisms comprise the anchor motif LYxxxxTG (Figs 5b and d).

372 The iron- and/or sulfur-oxidizing microorganisms from AMD (e.g., *Th.*  
373 *bhubaneswarensis*, *Ac. thiooxydans*, *Ga. acididurans*, *Sulfuriferula* sp.; Fig 4) also  
374 contain the PQQ domain (Fig 3b), while the PilY1-related protein (fragment) from the  
375 AMD metagenome (CBI05240.1) mostly corresponds to the vWA domain within the  
376 NTD that also comprises the MIDAS motif, DxSxSxxxxxxxxxT (Fig 3a). Further, the  
377 other sulfur-oxidizing microorganisms presented in the phylogenetic tree (Fig 4), *Te.*  
378 *thermophilus* and *T. drewsii* AZ1, included the PQQ domain in their tip-associated  
379 adhesin PilY1/PilC, according to SMART analyses [31]. The presence of PQQ in  
380 such PilY1/PilC proteins suggests that this adhesin initiates the biooxidation of  
381 reduced compounds (e.g., S<sup>0</sup> or metal sulfides as FeS<sub>2</sub>, and CuFeS<sub>2</sub>) and may be  
382 involved in electron transfer between the substrate and other components. *Sensu* Li  
383 and Li [27], the biooxidation of Fe(III) by *At. ferrooxidans* depends on functional pili  
384 which transfer electrons from the reduced Fe to the cell surface, while *At.*  
385 *ferrooxidans* attaches strongly to solid surfaces such as FeS<sub>2</sub> [6].

386

## 387 **Pilins PilW and PilV**

388 The 3D-modeling of PilW and PilV of *At. thiooxidans* (Figs 6a and b) revealed high  
389 similarities to the pilin of *Ps. aeruginosa* strain K, PAK (PDB key: 1oqw). For PilW,  
390 the model was also based on structures of a protein with structural similarity to  
391 flagellin of *Burkholderia pseudomallei* (4ut1A), a putative peptide-binding domain  
392 (adhesin) of *Marinomonas primoryensis* (5k8g), and the pilin FimA for adhesion from  
393 *Dichelobacter nodosus* (3sok).

394

395 **Figure 6. Bioinformatic analyses of the confirmed sequences of *At.***  
396 ***thiooxidans* PilW (AWP39906.1) and PilV (AWP39907.1).**

397 (a) 3-D model of PilW (TM-score:  $0.42 \pm 0.14$ ) and (b) PilV (TM-score:  $0.49 \pm 0.15$ )  
398 conducted in I-TASSER [36, 37] and BioLip [38]; the models were obtained based  
399 on structures from the PDB data base; for PilW: 5k8g, 1oqw, 4ut1A, 3sok, 4m00,  
400 5gaoE; for PilV: 1oqw, 3sok, 5bw0, 1ay2 and 3ci0. Modeling by homology of the  
401 NTD of (c) PilW (1-81 aa) and (d) PilV (11-62 aa) using as template the 3nje.1 minor  
402 pseudopilin from the *Ps. aeruginosa* [15]. for PilW, and the 5vxy.1.E pilin of *Ps.*  
403 *aeruginosa* and *N. gonorrhoeae* [55, 56] for PilV. (e) Multiple sequence alignment  
404 conducted in MEGA7 [42], of the region NTD (25-28 aa) of the confirmed PilW  
405 (AWP39906.1) and PilV (AWP39907.1) sequences of *At. thiooxidans*, and of other  
406 sequences from the gene bank of prepilin containing proteins of *At. thiooxidans*  
407 ATCC 19377 (WP\_010638979.1), *At. thiooxidans* Licanantay (WP\_051690664.1).  
408 *At. ferrooxidans* ATCC 593993 (ACH83326.1), *At. ferrivorans* (WP\_035191506.1),

409 *At. albertensis* (WP\_075323115.1) and *At. caldus* (WP\_070113768.1), as well as  
410 Tfp pilins or prepilins of *Ps. auriginosa* PAO1 (NP\_253215.1) *N. gonorrhoea*  
411 (SBO76855.1), *E. coli* (PIM50236.1), *Microcystis aeruginosa* (WP\_012267210.1),  
412 *Desulfovibrio magneticus* (EKO40131.1), *Shewanella baltica* (WP\_012588380.1)  
413 and *Mariprofundus micogutta* (WP\_083530569.1).

414

415 As the sequences 1oqw and 3sok, PilW and PilV of *At. thiooxidans* and other Tfp  
416 pilins have leader peptides of approximately 20-25 aa in the NTD with a highly  
417 conserved G and the GFXXXXE domain (Fig 6e). According to Dalrymple and  
418 Mattick [57] and Mattick [58], all the necessary information for the processing of  
419 subunits and assembly of pili is in these first aa of the  $\alpha$ 1-N; thus, mutations of NTD  
420 residues can markedly affect pilus assembly [13]. Specifically, the conserved  
421 glutamic acid E5 is the only charged residue in NTD (Fig 6b'), which is essential for  
422 pilus assembly and seems to be required for the methylation step [34, 55, 59]. In *At.*  
423 *thiooxidans*, E5 interacts with divalent cations such as  $\text{Ca}^{2+}$  (Fig 6b).

424 The CTD of PilW includes a region from aa residue 239 to 371 that is identified as  
425 the "Tfp pilus assembly protein PilW" (pfam16074). Its predicted secondary structure  
426 is mainly strands and coil, that define a globular head (Fig 6a), a head also observed  
427 in the 3-D model of PilV (Fig 6b). This globular head domain is a structurally variable  
428 region among the different pili, variability that imposes different functions, e.g.,  
429 specific subunit interactions and packing arrangements within the filament, pilus-  
430 pilus interaction, and interactions between the pili and their environment [55].

431

432 The molecular phylogenetic analysis confirms that PilW and PilV of *At. thiooxidans*  
433 are core subunits of Tfp, similar to PilW and PilV of *Ps. aeruginosa* PAO1 (Fig 7).

434

435 **Figure 7. Phylogenetic relationships based on the pilins PilW (AWP39906.1)**  
436 **and PilV (AWP39907.1) of *At. thiooxidans*.**

437 The evolutionary history obtained by ML (log likelihood -1678.78) using 12 amino  
438 acids sequences. There was a total of 97 positions in the final dataset. Evolutionary  
439 analyses were conducted in [42]. The aa sequences used were derived from: *At.*  
440 *calculus* ATCC 51756 (WP\_014002880.1); *At. ferrivorans* SS3 for PilW  
441 (WP\_035191506.1), *At. ferrivorans* CF27 (CDQ09112.1), *At. ferrooxidans*  
442 (ACH83326.1), *At. thiooxidans* ATCC 19377 for PilW (WP\_010638979.1) and PilV  
443 (WP\_010638981.1), *Ps. aeruginosa* PilW, (NP\_253242.1) and PilV (NP\_253241.1)  
444 and *T. thermophilus* (AAM55484.1).

445

446 Resuming, PilY1 (AWP39905.1) comprises the conserved *Neisseria*-PilC  
447 (superfamily) beta-propeller domain of the tip-associated adhesin while PilW  
448 (AWP39906.1) of the superfamily of putative Tfp assembly proteins, and PilV  
449 (AWP39907.1) belongs to the super family of Tfp assembly protein. Further analysis  
450 will be required to elucidate the specific function of PilY1, PilW and PilV as well as  
451 the molecular mechanisms of pili assembly in *At. thiooxidans*.

452

## 453 **Acknowledgments**

454 We thank LINAN-IPICYT, for providing laboratory support.

455

## 456 **References**

- 457 01. Crundwell FK. The dissolution and leaching of minerals: Mechanisms, myths  
458 and misunderstandings. *Hydrometallurgy*. 2013;139: 132-148. doi:  
459 10.1016/j.hydromet.2013.08.003.
- 460 02. Bevilaqua D, Acciari HA, Arena FA, Benedetti AV, Fugivara CS, Tremiliosi-  
461 Filho G, et al. Utilization of electrochemical impedance spectroscopy for  
462 monitoring bornite ( $\text{Cu}_5\text{FeS}_4$ ) oxidation by *Acidithiobacillus ferrooxidans*.  
463 *Miner Eng*. 2009;22: 254-262. doi: 10.1016/j.mineng.2008.07.010.
- 464 03. López-Cázares MI, Patrón-Soberano A, García-Meza JV. Bioelectrochemical  
465 changes during the early stages of chalcopyrite interaction with  
466 *Acidithiobacillus thiooxidans* and *Leptospirillum* sp. *Minerals*. 2017;7: 156.  
467 doi:10.3390/min7090156.
- 468 04. Echeverría-Vega A, Demergasso C. Copper resistance, motility and the  
469 mineral dissolution behavior were assessed as novel factors involved in  
470 bacterial adhesion in bioleaching. *Hydrometallurgy*. 2015;157: 107-115. doi:  
471 10.1016/j.hydromet.2015.07.018
- 472 05. Valdés J, Pedroso I, Quatrini R, Dodson RJ, Tettelin H, Blake R, et al.  
473 *Acidithiobacillus ferrooxidans* metabolism: From genome sequence to

- 474 industrial applications. BMC Genomics. 2008;9: 597. doi:10.1186/1471-  
475 2164-9-597.
- 476 06. Li YQ, Wan DS, Huang SS, Leng FF, Yan L, Ni YQ, Li HY. Type IV pili of  
477 *Acidithiobacillus ferrooxidans* are necessary for sliding, twitching motility, and  
478 adherence. Current Microbiol. 2010;60: 17-24. doi: 10.1007/s00284-009-  
479 9494-8.
- 480 07. Valdés J, Ossandon, F, Quatrini R, Dopson M, Holmes DS. Draft genome  
481 sequence of the extremely acidophilic biomining bacterium *Acidithiobacillus*  
482 *thiooxidans* ATCC 19377 provides insights into the evolution of the  
483 *Acidithiobacillus* genus. J Bacteriol. 2011;193: 7003-7004. doi:  
484 10.1128/JB.06281-11.
- 485 08. Acuña LG, Cárdenas JP, Covarrubias PC, Haristoy JJ, Flores R, Nuñez H,  
486 et al. Architecture and gene repertoire of the flexible genome of the extreme  
487 acidophile *Acidithiobacillus caldus*. PLoS One. 2013;8: e78237. doi:  
488 10.1371/journal.pone.0078237.t003.
- 489 09. Travisany D, Cortés MP, Latorre M, Genova A, Budinich M, Bobadilla-  
490 Fazzani R, Parada P, et al. A new genome of *Acidithiobacillus thiooxidans*  
491 provides insights into adaptation to a bioleaching environment. Res Microbiol.  
492 2014;165: 743-752. doi: 10.1016/j.resmic.2014.08.004.
- 493 10. Díaz M, Castro M, Copaja S, Guiliani N. Biofilm formation by the acidophile  
494 bacterium *Acidithiobacillus thiooxidans* involves c-di-GMP pathway and Pel  
495 exopolysaccharide. Genes. 2018;9: 113. doi: 10.3390/genes9020113.



- 496 11. Gerven N, Waksman G, Remaut H. Pili and Flagella: Biology, structure, and  
497 biotechnological applications. *Prog Mol Biol Transl Sci.* 2011;103: 21-72. doi:  
498 10.1016/B978-0-12-415906-8.00005-4.
- 499 12. Conrad JC. Physics of bacterial near-surface motility using flagella and type  
500 IV pili: implications for biofilm formation. *Res Microbiol.* 2012;163: 619-629.  
501 doi: 10.1016/j.resmic.2012.10.016.
- 502 13. Craig L, Pique ME, Tainer JA. Type IV pilus structure and bacterial  
503 pathogenicity. *Nat Rev Microbiol.* 2004;2: 363-378. doi: 10.1038/nrmicro885.
- 504 14. Pugsley AP. The complete general secretory pathway in gram-negative  
505 bacteria. *Microbiol Rev.* 1993;57: 50-108.
- 506 15. Franz LP, Douzi, B, Durand, E, Dyer, DH, Voulhoux, R, Forest, KT. Structure  
507 of the minor pseudopilin XcpW from the *Pseudomonas aeruginosa* type II  
508 secretion system. *Acta Cryst Sect D.* 2011; 67: 124-130. doi:  
509 10.1107/s0907444910051954.
- 510 16. Hartung S, Arvai AS, Wood T, Kolappan S, Shin DS, Craig L, et al. Ultrahigh  
511 resolution and full-length pilin structures with insights for filament assembly,  
512 pathogenic functions, and vaccine potential. *J Biol Chem.* 2011;286: 44254-  
513 44265. doi: 10.1074/jbc.M111.297242.
- 514 17. Berry J, Pelicic V. Exceptionally widespread nanomachines composed of  
515 type IV pilins: The prokaryotic Swiss Army knives. *FEMS Microbiol Rev.*  
516 2015;39: 134-154. doi: 10.1093/femsre/fuu001.
- 517 18. Pelicic V. Type IV pili: e pluribus unum? *Mol Microbiol.* 2008;68: 827-837. doi:  
518 10.1111/j.1365-2958.2008.06197.x.

- 519 19. Rudel T, Scheuerpflug I, Meyer TF. *Neisseria* PilC protein identified as type-  
520 4 pilus tip-located adhesin. *Nature*. 1995;373: 357-359. doi:  
521 10.1038/373357a0.
- 522 20. Nassif X, Marceau M, Pujol C, Pron B, Beretti JL, Taha MK. Type-4 pili and  
523 meningococcal adhesiveness. *Gene*. 1997;192: 149-153. doi:  
524 10.1016/S0378-1119(96)00802-5.
- 525 21. Craig L, Volkmann N, Arvai AS, Pique ME, Yeager M, Egelman EH, et al.  
526 Type IV pilus structure by cryo-electron microscopy and crystallography:  
527 Implications for pilus assembly and functions. *Mol Cell*. 2006;23: 651-662.  
528 doi: 10.1016/j.molcel.2006.07.004.
- 529 22. Heiniger RW, Winther-Larsen HC, Pickles RJ, Koomey M, Wolfgang MC.  
530 Infection of human mucosal tissue by *Pseudomonas aeruginosa* requires  
531 sequential and mutually dependent virulence factors and a novel  
532 pilus-associated adhesin. *Cell Microbiol*. 2010;12: 1158-1173. doi:  
533 10.1111/j.1462-5822.2010.01461.x.
- 534 23. Orans J, Johnson MD, Coggan KA, Sperlazza JR, Heiniger RW, Wolfgang  
535 MC, et al. Crystal structure analysis reveals *Pseudomonas* PilY1 as an  
536 essential calcium-dependent regulator of bacterial surface motility. *Proc Natl*  
537 *Acad Sci USA*. 2010;107: 1065-1070. doi:10.1073/pnas.0911616107.
- 538 24. Goosens VJ, Busch A, Georgiadou M, Castagnini M, Forest KT, Waksman  
539 G, Pelicic V. Reconstitution of a minimal machinery capable of assembling  
540 type IV pili. *Proc Natl Acad Sci USA*. 2017;114: E4978-E4986. doi:  
541 10.1073/pnas.1618539114.
- 542 25. Winther-Larsen HC, Wolfgang M, Dunham S, Van Putten JP, Dorward D,  
543 Løvold C, et al. A conserved set of pilin-like molecules controls type IV pilus

- 544 dynamics and organelle-associated functions in *Neisseria gonorrhoeae*. Mol  
545 Microbiol. 2005;56: 903-917. doi: 10.1111/j.1365-2958.2005.04591.x.
- 546 26. Carbonnelle E, Hélaine S, Prouvensier L, Nassif X, Pelicic V. Type IV pilus  
547 biogenesis in *Neisseria meningitidis*: PilW is involved in a step occurring after  
548 pilus assembly, essential for fibre stability and function. Mol Microbiol.  
549 2005;55: 54-64. doi: 10.1111/j.1365-2958.2004.04364.x.
- 550 27. Li Y, Li H. Type IV pili of *Acidithiobacillus ferrooxidans* can transfer electrons  
551 from extracellular electron donors. J Basic Microbiol. 2013;54: 226-231.  
552 doi:10.1002/jobm.201200300.
- 553 28. Reardon PN, Mueller KT. Structure of the type IVa major pilin from the  
554 electrically conductive bacterial nanowires of *Geobacter sulfurreducens*. J  
555 Biological Chem. 2013;288: 29260-29266. doi: 10.1074/jbc.M113.498527
- 556 29. Untergasser A, Cutcutache I, Koressaar T, Ye J, Faircloth BC, Remm M, et  
557 al. Primer3- New capabilities and interfaces. Nucleic Acids Res. 2012;40:  
558 e115. doi: 10.1093/nar/gks596
- 559 30. Corpet F. Multiple sequence alignment with hierarchical clustering. Nucl  
560 Acids Res. 1988;16: 10881-10890. doi: 10.1093/nar/16.22.10881. Available  
561 from: <http://multalin.toulouse.inra.fr/multalin/>
- 562 31. Letunic I, Doerks T, Bork P. SMART: recent updates, new developments and  
563 status in 2015. Nucleic Acids Res. 2015;D257-D260. doi:  
564 10.1093/nar/gku949. Available from: <http://smart.embl-heidelberg.de/>
- 565 32. PROSITE. Available from: <https://prosite.expasy.org>
- 566 33. Finn RD, Coggill P, Eberhardt RY, Eddy SR, Mistry J, Mitchell AL, et al. The  
567 Pfam protein families database: towards a more sustainable future. Nucleic

- 568 Acids Res. 2016;44: D279-D285. doi: 10.1093/nar/gkv1344. Available from:  
569 <https://pfam.xfam.org>
- 570 34. Marchler-Bauer A, Bo Y, Han L, He J, Lanczycki CJ, Lu S, et al.  
571 CDD/SPARCLE: Functional classification of proteins via subfamily domain  
572 architectures. Nucleic Acids Res. 2017;45: D200-D203. doi:  
573 10.1093/nar/gkw1129. Available from:  
574 <https://www.ncbi.nlm.nih.gov/Structure/cdd/cdd.shtml>
- 575 35. Biasini M, Bienert S, Waterhouse A, Arnold K, Studer G, Schmidt T, et al.  
576 SWISS-MODEL: Modelling protein tertiary and quaternary structure using  
577 evolutionary information. Nucleic Acids Res. 2014;42: W252- W258. doi:  
578 10.1093/nar/gku340. Available from: <https://www.swissmodel.expasy.org/>
- 579 36. Roy A, Yang J, Zhang Y. COFACTOR: An accurate comparative algorithm  
580 for structure-based protein function annotation. Nucleic Acids Res. 2012;40:  
581 W471-W477. 10.1093/nar/gks372 Available from:  
582 <https://zhanglab.ccmb.med.umich.edu>
- 583 37. Yang J, Zhang Y. I-TASSER server: New development for protein structure  
584 and function predictions, Nucleic Acids Res. 2015;43: W174-W181. doi:  
585 10.1093/nar/gkv342. Available from: <https://zhanglab.ccmb.med.umich.edu>
- 586 38. Yang J, Roy A, Zhang Y. BioLiP: A semi-manually curated database for  
587 biologically relevant ligand-protein interactions. Nucleic Acids Res. 2013;41:  
588 D1096-D1103. doi: 10.1093/nar/gks966.
- 589 39. Altschul SF, Madden TL, Schäffer AA, Zhang J, Zhang Z, Miller W, et al.  
590 Gapped BLAST and PSI-BLAST: A new generation of protein database

- 591 search programs. *Nucleic Acids Res.* 1997;25: doi: 3389-3402.  
592 10.1093/nar/25.17.3389. Available from: <https://blast.ncbi.nlm.nih.gov>
- 593 40. Altschul SF, Wootton JC, Gertz EM, Agarwala R, Morgulis A, Schäffer AA, et  
594 al. Protein database searches using compositionally adjusted substitution  
595 matrices. *FEBS J.* 2005;272: 5101-5109. Doi: 10.1111/j.1742-  
596 4658.2005.04945.x.
- 597 41. UniProt. Available from: <http://www.uniprot.org>
- 598 42. Kumar S, Stecher G, Tamura K. MEGA7: Molecular Evolutionary Genetics  
599 Analysis version 7.0 for bigger datasets. *Mol Biol Evol.* 2016;33: 1870-1874.  
600 doi: 10.1093/molbev/msw054
- 601 43. Jones DT, Taylor WR, Thornton JM. The rapid generation of mutation data  
602 matrices from protein sequences. *Bioinformatics.* 1992;8: 275-282. doi:  
603 10.1093/bioinformatics/8.3.275.
- 604 44. Felsenstein J. Confidence limits on phylogenies: An approach using the  
605 bootstrap. *Evolution.* 1985;39: 783-791. doi:  
606 10.1016/j.hydrmet.2015.07.018.
- 607 45. Panda SK, Jyoti V, Bhadra B, Nayak KC, Shivaji S, Rainey FA, et al.  
608 *Thiomonas bhubaneswarensis* sp. nov., an obligately mixotrophic,  
609 moderately thermophilic, thiosulfate-oxidizing bacterium. *Int J Syst Evol*  
610 *Microbiol.* 2009;59: 2171-2175. doi: 10.1099/ijs.0.007120-0.
- 611 46. Hallberg KB, Hedrich S, Johnson DB. *Acidiferrobacter thiooxydans*, gen. nov.  
612 sp. nov.; an acidophilic, thermo-tolerant, facultatively anaerobic iron- and  
613 sulfur-oxidizer of the family Ectothiorhodospiraceae. *Extremophiles.* 2011;15:  
614 271-279. doi: 10.1007/s00792-011-0359-2.

- 615 47. Johnson MDL, Garrett CK, Bond JE, Coggan KA, Wolfgang MC, Redinbo  
616 MR. *Pseudomonas aeruginosa* PilY1 binds integrin in an RGD-and calcium-  
617 dependent manner. PloS One. 2011;6: e29629. doi:  
618 10.1371/journal.pone.0029629
- 619 48. Kadnikov VV, Ivasenko DA, Beletsky AV, Mardanov AV, Danilova EV,  
620 Pimenov NV, et al. A Novel uncultured bacterium of the family  
621 Gallionellaceae: Description and genome reconstruction based on the  
622 metagenomic analysis of microbial community in acid mine drainage.  
623 Microbiology. 2016;85: 421-435. doi: 10.1134/S002626171604010X.
- 624 49. Jones DS, Roepke EW, Hua AA, Flood BE, Bailey JV. Complete genome  
625 sequence of *Sulfuriferula* sp. strain AH1, a sulfur-oxidizing autotroph isolated  
626 from weathered mine tailings from the Duluth Complex in Minnesota.  
627 Genome Announc. 2017;5: e00673-17. doi: 10.1128/genomeA.00673-17.
- 628 50. Krishnan V, Dwivedi P, Kim BJ, Samal A, Macon K, Ma X, et al. Structure of  
629 *Streptococcus agalactiae* tip pilin GBS104: A model for GBS pili assembly  
630 and host interactions. Acta Crystallogr Sect D: Biol Crystallogr. 2013;69:  
631 1073-1089. doi:10.1107/S0907444913004642.
- 632 51. Zhang K, Chen J. The regulation of integrin function by divalent cations. Cell  
633 Adhes Migr. 2012;6: 20-29. doi: 10.4161/cam.18702.
- 634 52. Lee JO, Rieu P, Arnaout MA, Liddington R. Crystal structure of the A domain  
635 from the *a* subunit of integrin CR3 (CD11 b/CD18). Cell. 1995;80: 631-638.  
636 doi: 10.1016/0092-8674(95)90517-0.
- 637 53. Broeker NK, Gohlke U, Müller JJ, Uetrecht C, Heinemann U, Seckler R, et al.  
638 Single amino acid exchange in bacteriophage HK620 tailspike protein results

- 639 in thousand-fold increase of its oligosaccharide affinity. *Glycobiology*.  
640 2012;23: 59-68. doi: 10.1093/glycob/cws126.
- 641 54. Anthony C. Pyrroloquinoline quinone (PQQ) and quinoprotein enzymes.  
642 *Antioxid Redox Signal*. 2001;3: 757-774. doi: 10.1089/15230860152664966
- 643 55. Craig L, Taylor RK, Pique ME, Adair BD, Arvai AS, Singh M, et al. Type IV  
644 pilin structure and assembly: X-ray and EM analyses of *Vibrio cholerae* toxin-  
645 coregulated pilus and *Pseudomonas aeruginosa* PAK pilin. *Mol Cell*.  
646 2003;11: 1139-1150. doi: 10.1016/S1097-2765(03)00170-9
- 647 56. Wang F, Coureuil M, Osinski T, Orlova A, Altindal T, Gesbert G, et al.  
648 Cryoelectron microscopy reconstructions of the *Pseudomonas aeruginosa*  
649 and *Neisseria gonorrhoeae* type IV pili at sub-nanometer resolution. *Struct*.  
650 2017;25: 1423-1435. doi: 10.1016/j.str.2017.07.016.
- 651 57. Dalrymple B, Mattick JS. An Analysis of the organization and evolution of  
652 type 4 fimbrial (MePhe) subunit proteins. *J Mol Evol*. 1987;24: 261-269. doi:  
653 10.1007/BF02100020.
- 654 58. Mattick JS. Type IV pili and twitching motility. *Annu Rev Microbiol*. 2002;56:  
655 289-314. doi: 10.1146/annurev.micro.56.012302.160938.
- 656 59. Hobbs M, Mattick JS. Common components in the assembly of type 4  
657 fimbriae, DNA transfer systems, filamentous phage and protein-secretion  
658 apparatus: a general system for the formation of surface-associated protein  
659 complexes. *Mol Microbiol*. 1993;10: 233-243. doi: 10.1111/j.1365-  
660 2958.1993.tb01949.x.
- 661

## 662 **Supporting information**

663 **S1 Table**

664 **S2 Table**

665

## 666 **Authors' contributions**

667 JVGM and JAMC conceived and designed the experiments. EAS and AHS  
668 performed, described and discuss the sequencing. OASP conceived, designed,  
669 performed, described and discuss the TEM analyses. JVGM performed and  
670 discussed the bioinformatics analysis. MAG discussed the overall results. JAMC,  
671 JVGM and OASP contributed with reagents/materials/analysis tools. JVGM is senior  
672 author.



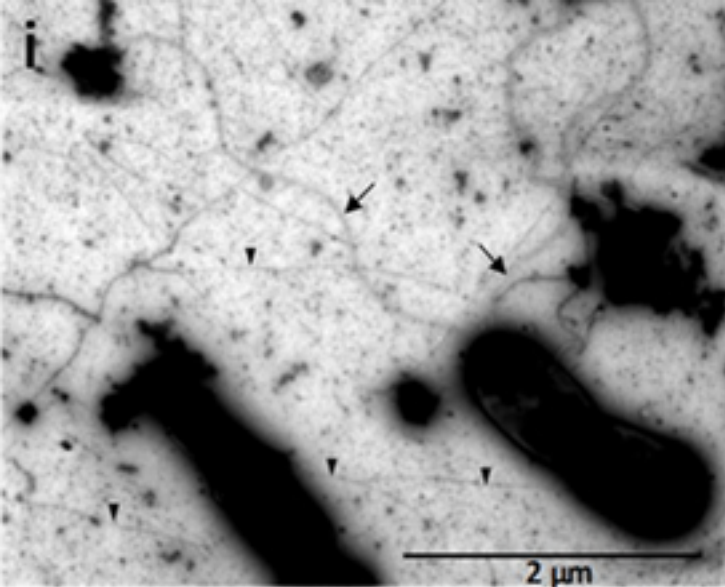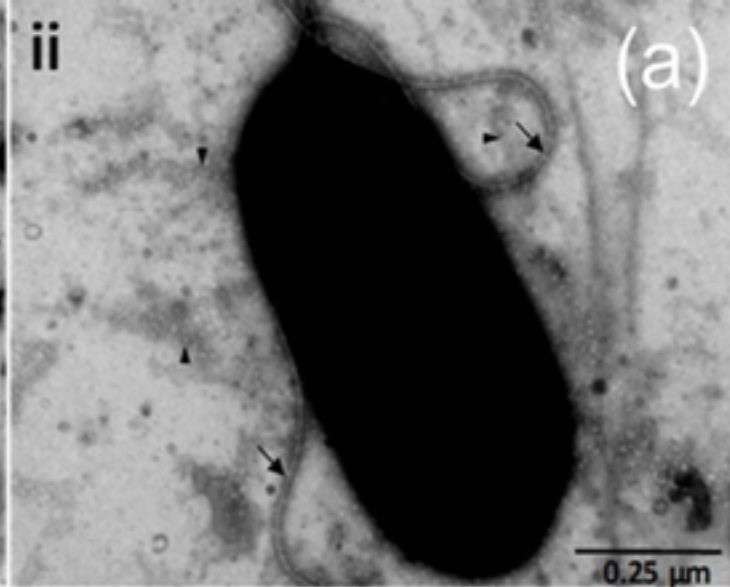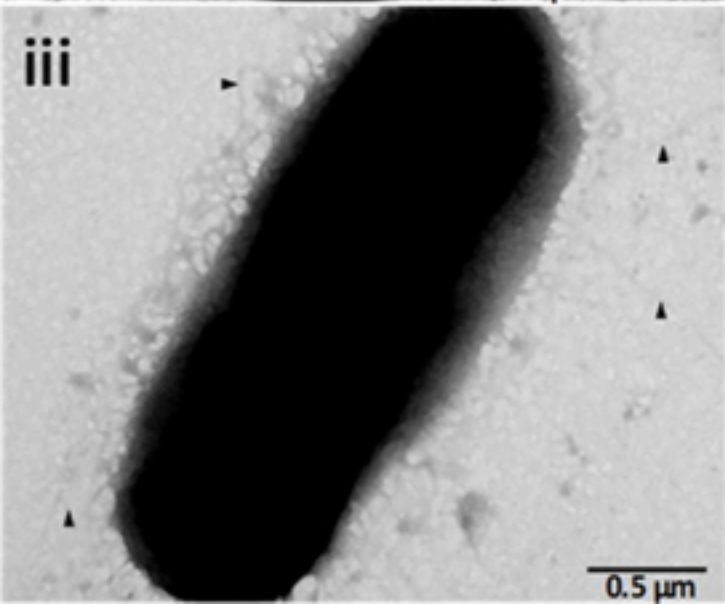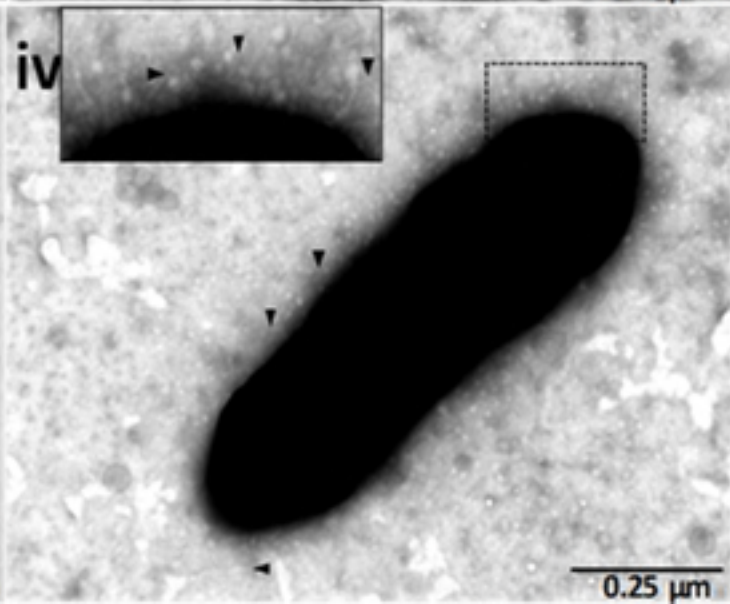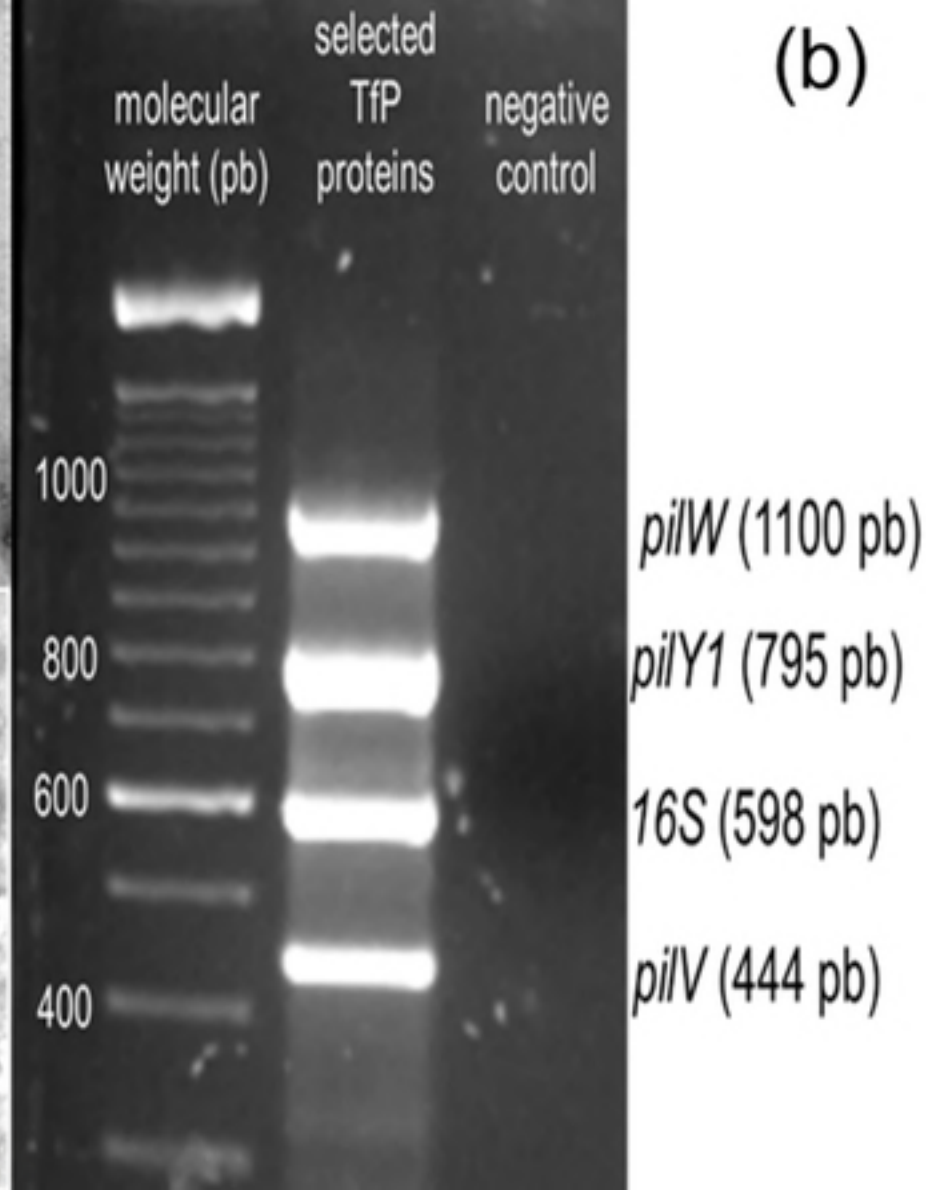

AWP39905.1 M K K K I R Q K F L V S V L C L S M S A A P L V S W S S F A Q A N . T I T I L P A N Q P Q V M I L L  
 WP 010638975.1 M K K K I R Q K F L V S L L S L S M C T A P L V S W S S F A Q A N S T I N I L P A N Q P Q V M I L L  
 AWP39905.1 D N S Q G M A G V L Q G P T G L S G A I M T G S G W G S S N P N S S N Y N E N L S S S S P V A Y T A  
 WP 010638975.1 D N S Q G M A G V L Q G P T G L S G A I M T G S G - - - - - T V P E D A N S S S P V S Y T A  
 AWP39905.1 S G F T P P A L G S K G A S A L Y S V P C N T S G I T A A A O S A C K A V G A S T S S N T S S S T  
 WP 010638975.1 S G F T P P A L G S P G T S V P Y S V P C N T S G I T A A A L S A C K V V G A S T S T S A T S T S T  
 AWP39905.1 N Y G Y I D N S G S M L N V A E Q A I G T I I N T P E Y N N N I O F G L M D Y A L S G N V S L Y N T  
 WP 010638975.1 N Y G Y I D N S E S M L N V A E Q A I S T I I G T P E Y N S N I O F G L M D Y A L S G O V S L Y N T  
 AWP39905.1 W V Y Y M S D N N G F S F G T S A T G A V P S G D I A V N N P C Y G S V S N G Y F T N N S C A K I Y N  
 WP 010638975.1 W V Y Y M S D N N G F S F G S K A T E V P S G D V A V K N P C Y G S I S N G H F T N N S C A N I Y K  
 AWP39905.1 L G Y N N L S V S G L Y N D N Y L Y V N A S S D A P I I N D V M Y A T G Y G G A G S G S T N A V G V  
 WP 010638975.1 L G Y N N L S V N G L Y N D E Y L F I N A S S D D P I I N D V I Y A P S S G I G G Y V N T V S G  
 AWP39905.1 N P T L N N M S L P D Y E Q L A I G Y T A S T P Y V T Y Y R Y T S R L A S N M A P T S A G Y I S O  
 WP 010638975.1 N P K T Y G M T L T D Y M O Q K S G - - - - - V K Y K K Y I A F - - - - - G Y S T P T S A G Y F P M  
 AWP39905.1 S Y Q Q W L S Q R G Y A F N A S T S Y N N G N I V S Y I S A T N S T N A T N I A N A I L P E V F L P  
 WP 010638975.1 S Y Q V W F S Q R G Y A F N A S T S Y N N G N I I S P I S A N N S T N T T N I A N A I L P E V F L P  
 AWP39905.1 N N G S F N Y A S N G - P I T A S A G Y S P M A G A F S T A L N Y Y E G K L K K O - P P T T C G S  
 WP 010638975.1 N K R S F N Y A S K G O P I T A S A G Y S P V A G A F S T A L S Y F - G K T P N O G G P P S T C G S  
 AWP39905.1 K Y V I F I T D G Q P T Q G M N N G Y V Y P P L G S A S A Q M F - - - - - G V T S I T A S T W S S T  
 WP 010638975.1 K Y V I F I T D G Q P T Q G - S G G N V Y P P L G G A S A Q L F Y P P S T S V T A S N A G S S A S D  
 AWP39905.1 N N N A V V E A I Q E I Q A L A Q Q G I K T Y V L G V G S A V N P N V P G A S A A D Q A V A L O G O  
 WP 010638975.1 P N N A V V E A I Q G I Q A L A Q K G I K T Y V L G V G S A V N P N V P G A S A A D Q A V A L O A O  
 AWP39905.1 A V L T A M A Q A G G T T N F Y A A T S A S D V S A M N S I I A N I L G K S V S A S Y G A P P S A  
 WP 010638975.1 A V L T A M A Q A G G T T N F Y A A T S A S D V S A M N S I I A N I L G K S V S A S Y G A P P S A  
 AWP39905.1 T V G S L E F L L K D V N P I T G Q G D L Y A Y A L Q S N G T P S V S A S W D A N T M N I K N R T  
 WP 010638975.1 T V G S L E F L L K N V N P I T G Q G D L Y A Y A L Q S N G T P S I S P S W N A N S - - N M S N R S  
 AWP39905.1 S Y L Y T T T P G G T N G A G T E I S L T S V A T N T P S A F G T L P T S L T A G T I A A Y T I N P  
 WP 010638975.1 S A L Y T T A P G G T N G A G T E S S L T S V A T N T P G A F G T L P T S L T A S T I A A Y T I N P  
 AWP39905.1 S A S G G A Y L G G R O S G W Y M G L P T S T P P Q V L T A P N N G O L L G A G G T T N S Y L K F A  
 WP 010638975.1 S A S G G A Y L G G R O S G W Y M G L P T S T P P Q V L T A P N N G O L L C A G G S T N S Y L T F A  
 MH021598 Q L H A S R Q N A V L F S D N D G F L Y A M G Y N N T G S P T L L W G W M P Q G L L P Q L O N Y N T  
 WP 010638975.1 D K H V N R Q N A V L F S D N D G F L Y A M G Y N N T G S P T L L W G W M P Q G L L P Q L O N Y N T  
 AWP39905.1 F W Q G V S M Q G G F O T V D A T V A P T T N S H T W H T Y V A G S A S N G S I L Y D L Q L T G T G  
 WP 010638975.1 F W Q G V S M Q G G F O T V D A T V A P T T N S H T W H T Y V A G S A S N G S I L Y D L Q L - - T G  
 AWP39905.1 T A G P D L S Q T V W E D D L G E N Y S Q P O P S N P V F Y Q Y O T P G T T S F G O T W A L W A V N  
 WP 010638975.1 T A A P D L S Q T V W E D D L G D N Y S Q P O P S N P V F Y Q Y O T P G T T S F G O T W A L W A V N  
 AWP39905.1 K A I S A T S S T S Y L I G V N V G T G O S F O D S L P F N N T A T P Y I D A S G N L Y L G D N T G  
 WP 010638975.1 K A I S A T S S T S Y L I G V N V G T G O S F O D S L P F N N T A T P Y I D A S G N L Y L G D N T G  
 AWP39905.1 N I Y E I S T A T L P G L L T P G A A T L T L A K D F V N N A A I G N Y S S A W S G S L S G S N P G  
 WP 010638975.1 N I Y E I S S A T L P G L L T P G A A T L T L A K D F V N N A A I G N Y S S A W S G S L S G S N P G  
 AWP39905.1 E V Q Y I G G S Y Y O G K N Y L R V O G P N G I T I F S Q L N G T W L P V W S A Y A G G A G I W S S  
 WP 010638975.1 E V Q Y I G G S Y Y O G K N Y L R V O G P N G I T I F S Q L N G T W L P V W S A Y A G G A G I W S S  
 AWP39905.1 G A F T T O T S S A N P P I T A L P A G S V V S A P A L I N S G A V I L P V T V P P S A N T C G N S  
 WP 010638975.1 G A F T A O T S S A N P P I T A L P A G S V V S A P A L I N S G A V I L P V T V P P S A N T C G N S  
 AWP39905.1 N A Y Y Y L Y A L N N G I F P S G T F T N S T G V P I T S A L F V G Y G T A F T P T V S S F N G R T  
 WP 010638975.1 N A Y Y Y L Y A L N N G I F P S G T F T N S T G I P I T S A L F V G Y G T A F T P A V S S F N G R T  
 AWP39905.1 L L O G S A N N T G P T K M F P T G F G A G L P L G G P T G W K L V N  
 WP 010638975.1 L L O G S A N N T G P T K M F P T G F G A G L P L G G P T G W K L V N

distance: 0.13 (a)

AWP39905.1 M R Q A D V S E T G F T L T E L L I A L V I S T L L A T A V F T F F L N S S Q I I T N Q S S T D M  
 WP 010638975.1 M R Q A D V S E T G F T L T E L L I A L V I S T L L A A A V F T F F L N S S Q I I T N Q S S T D M  
 AWP39905.1 W Q R G R N A L A I V R Q A V E S A G F G L P Q V S D C P N G I A A Y N S N Q T T S P F S L T A I T  
 WP 010638975.1 W Q R G R N A L A I V R Q A V E S A G F G L P Q V S D C P N G I A A Y N S N Q T T S P F S L T A I T  
 AWP39905.1 A S V Q S S G T Y D P T S I S N I N T Y S L M T V A G G A S F G N A P A A Q I S S I P S W T S Q R V  
 WP 010638975.1 A S V Q S S G T Y D P T S I S N I N T Y S L M T V A G G A S F G N A P A A Q I S S I P S W T S Q R V  
 AWP39905.1 F L T A T A F I N S G O I F I V Q I P G Q A C L M A Q V T N L L T Q G N G I G I V H N S G L S N Y N  
 WP 010638975.1 F L T A T A F I N S G O I F I V Q I P G Q A C L M A Q V T N L L T Q G N A I G I V H N S G L S N Y N  
 AWP39905.1 P S G F T L A G A I Y P G L S S T A F V G A N F I D L G S N N F T I N Q F T I G D S G G T A T P  
 WP 010638975.1 P S G F T L A G A I Y P G L S S T A F V G A N F I D L G S N N F T I N Q F T I G D S G G T A T P  
 AWP39905.1 T L Y L T Q Y T A N Q T T S T R Q A L A R G V V D L Q L E Y G L G N N G A I T Q W V L P A N Y T G  
 WP 010638975.1 T L Y L T Q Y T A N Q T T S T R Q A L A R G V V D L Q L E Y G L G N N G A I T Q W V L P A N Y T A  
 AWP39905.1 S A T Q I L A V R I A M L A R S T R Y M P N E T S P A S F V M L P N Q N L S Y T V P T S N G P G C  
 WP 010638975.1 S A T Q I L A V R I A M L A R S T R Y M P N E T S P A S F V M L P N Q N L S Y T V P T S N G P G C  
 AWP39905.1 L Q G N C R H Y A Y H L F E S V P P V R N N I W G G S  
 WP 010638975.1 L Q G N C R H Y A Y H L F E S V P P V R N N I W G G S

distance: 0.02 (b)

AWP39907.1 W H S P Q Q P E Q G L T I E T M I A L A I F A I G S L G I L A I L M T G F S T S A E G N N L T G G  
 WP 010638981.1 W H S P Q Q P E Q G L T I E T M I A L A I F A I G S L G I L A I L M T G F S T S A E G N N L T G G  
 AWP39907.1 Y Q I A Q N A L G L I R A N G S N A L Q F N G A A I S P T G N V T V P G S A N T T V A Q A I S T W K  
 WP 010638981.1 Y Q I A Q N A L G L I R A N G S N A L Q F N G A A I S P T G N V T V P G S A N T T V A Q A I S T W K  
 AWP39907.1 N M L Y P P G L P P A L P S A S G S I T V L S Q Q G N G M C P C I A T V S V S W R L N G T P E T Y S  
 WP 010638981.1 N M L Y P P G L P P A L P S A S G S I T V L S Q Q G N G M C P C I A T V S V S W R L N G T P E T Y S  
 AWP39907.1 V Q T I V G Y  
 WP 010638981.1 V Q T I V G Y

distance: 0.0 (c)



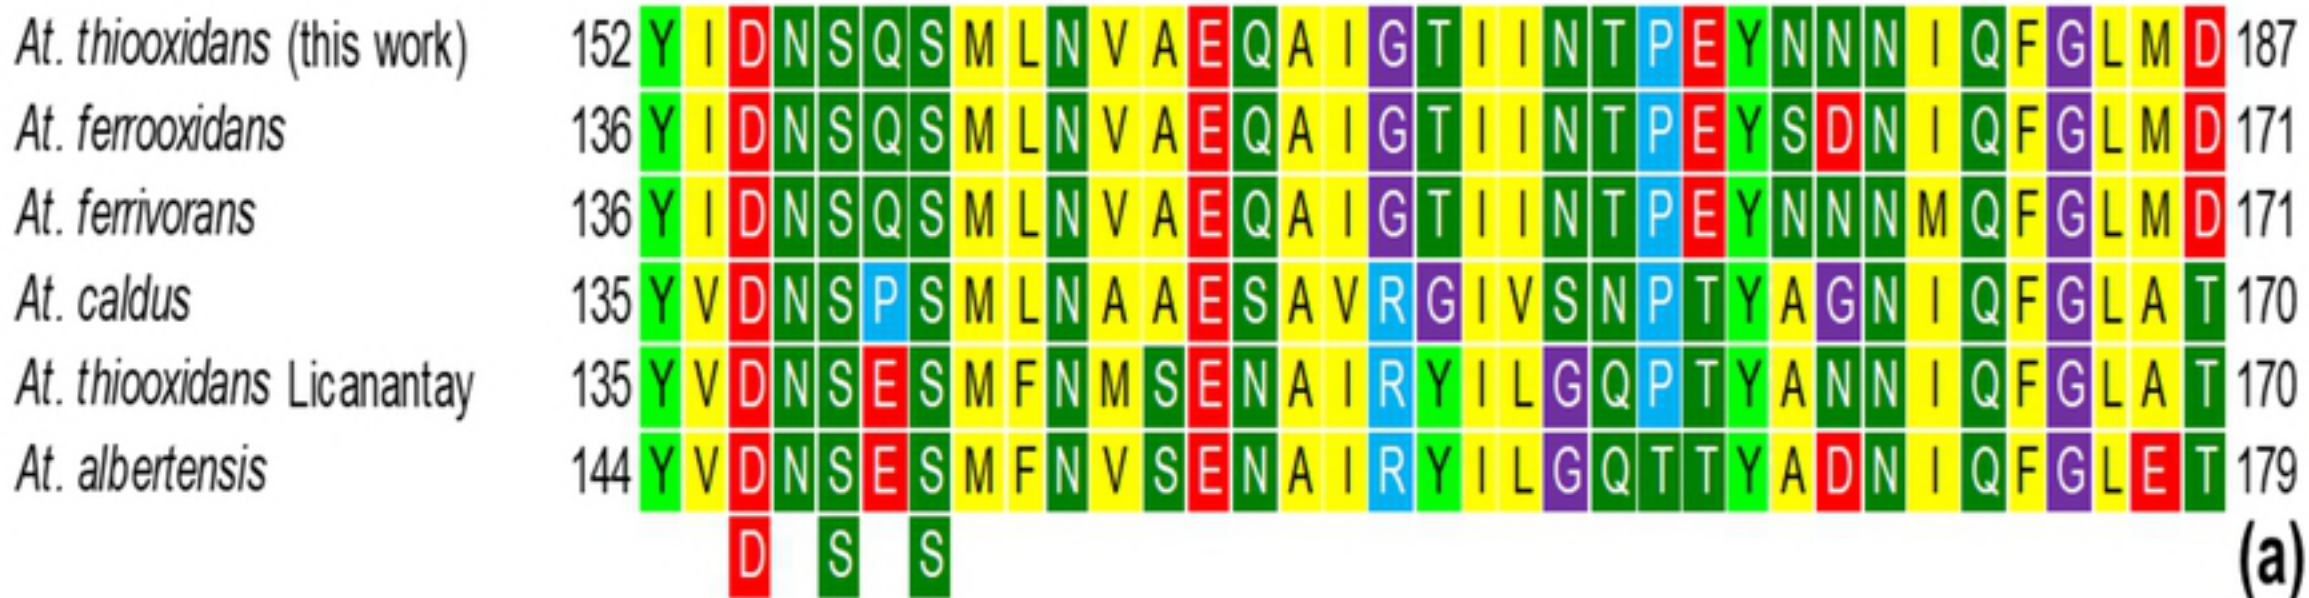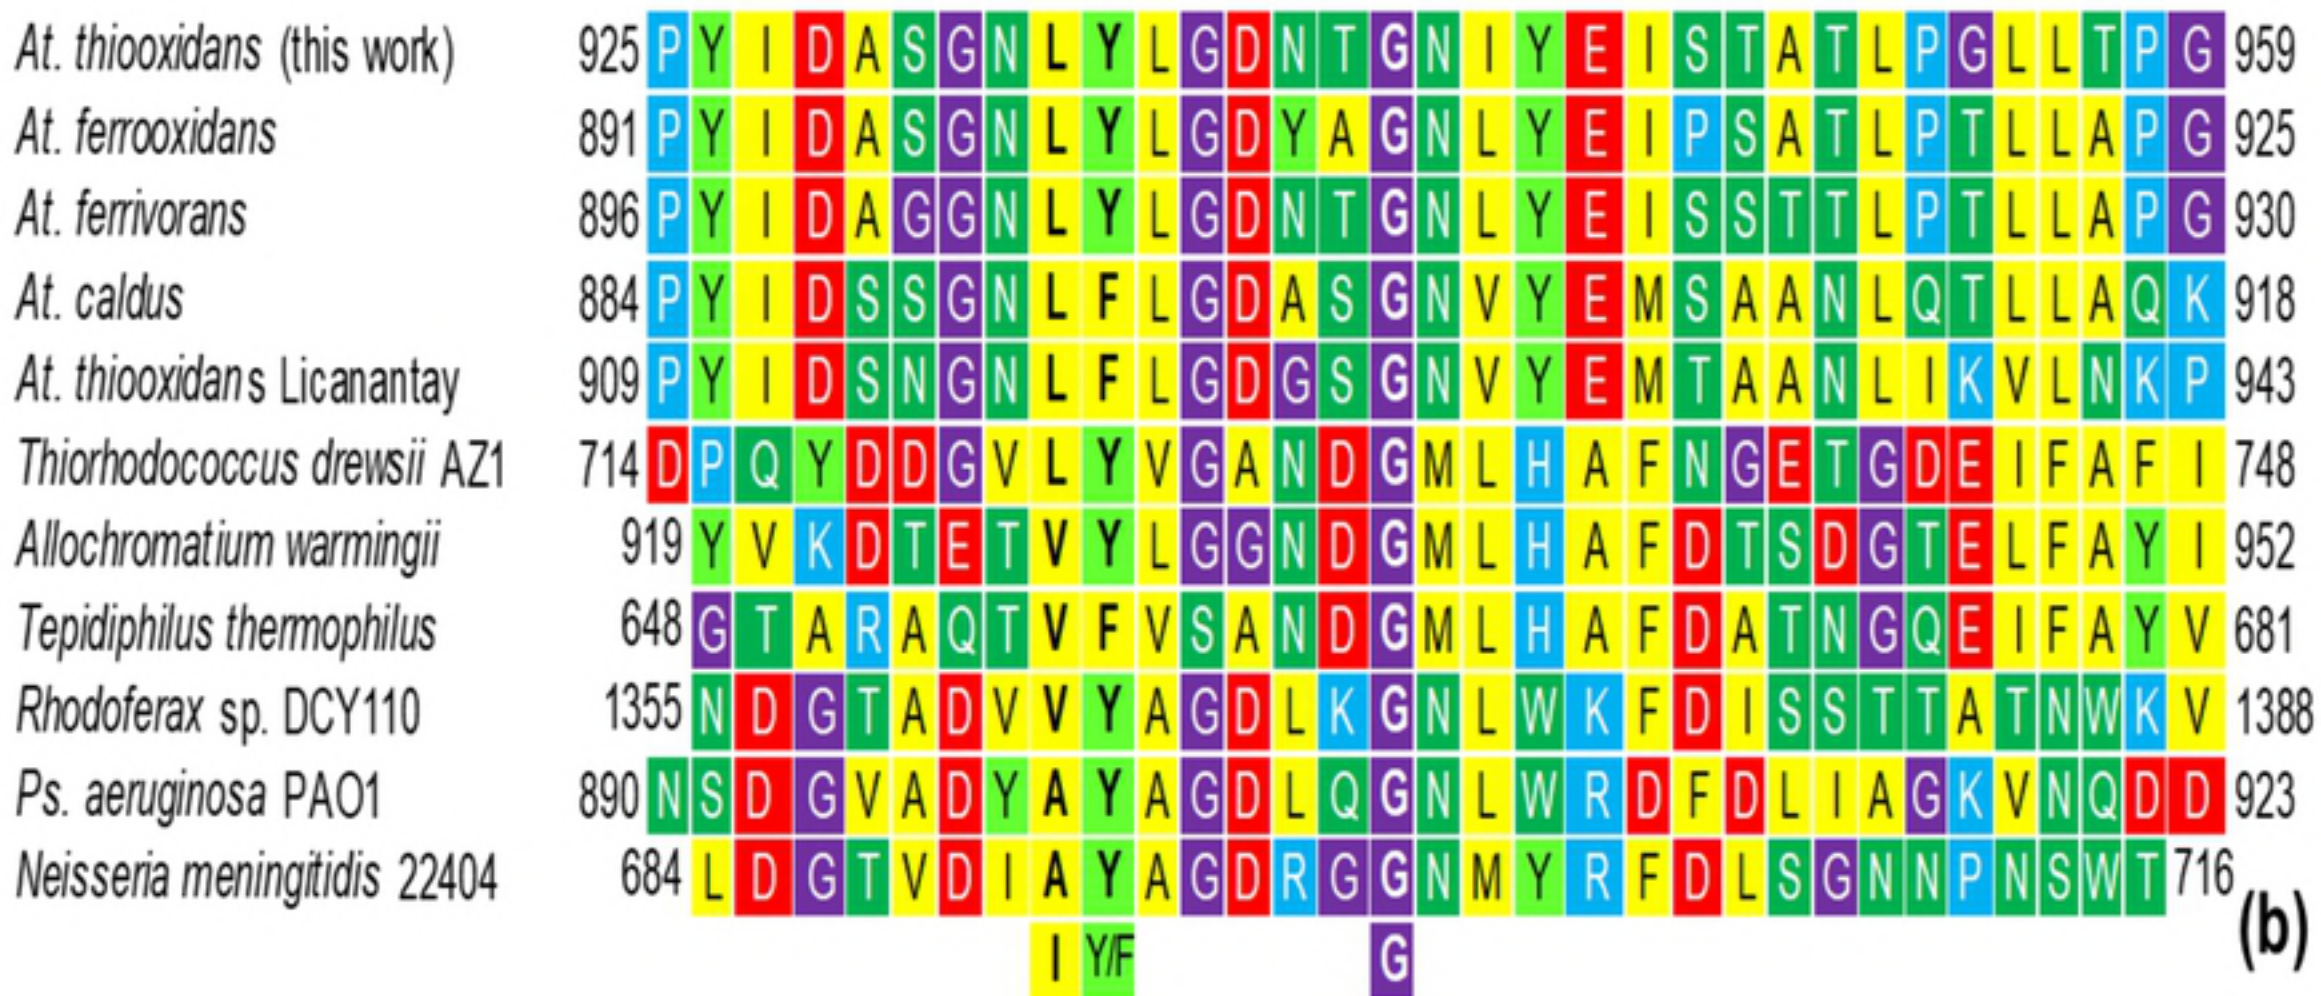

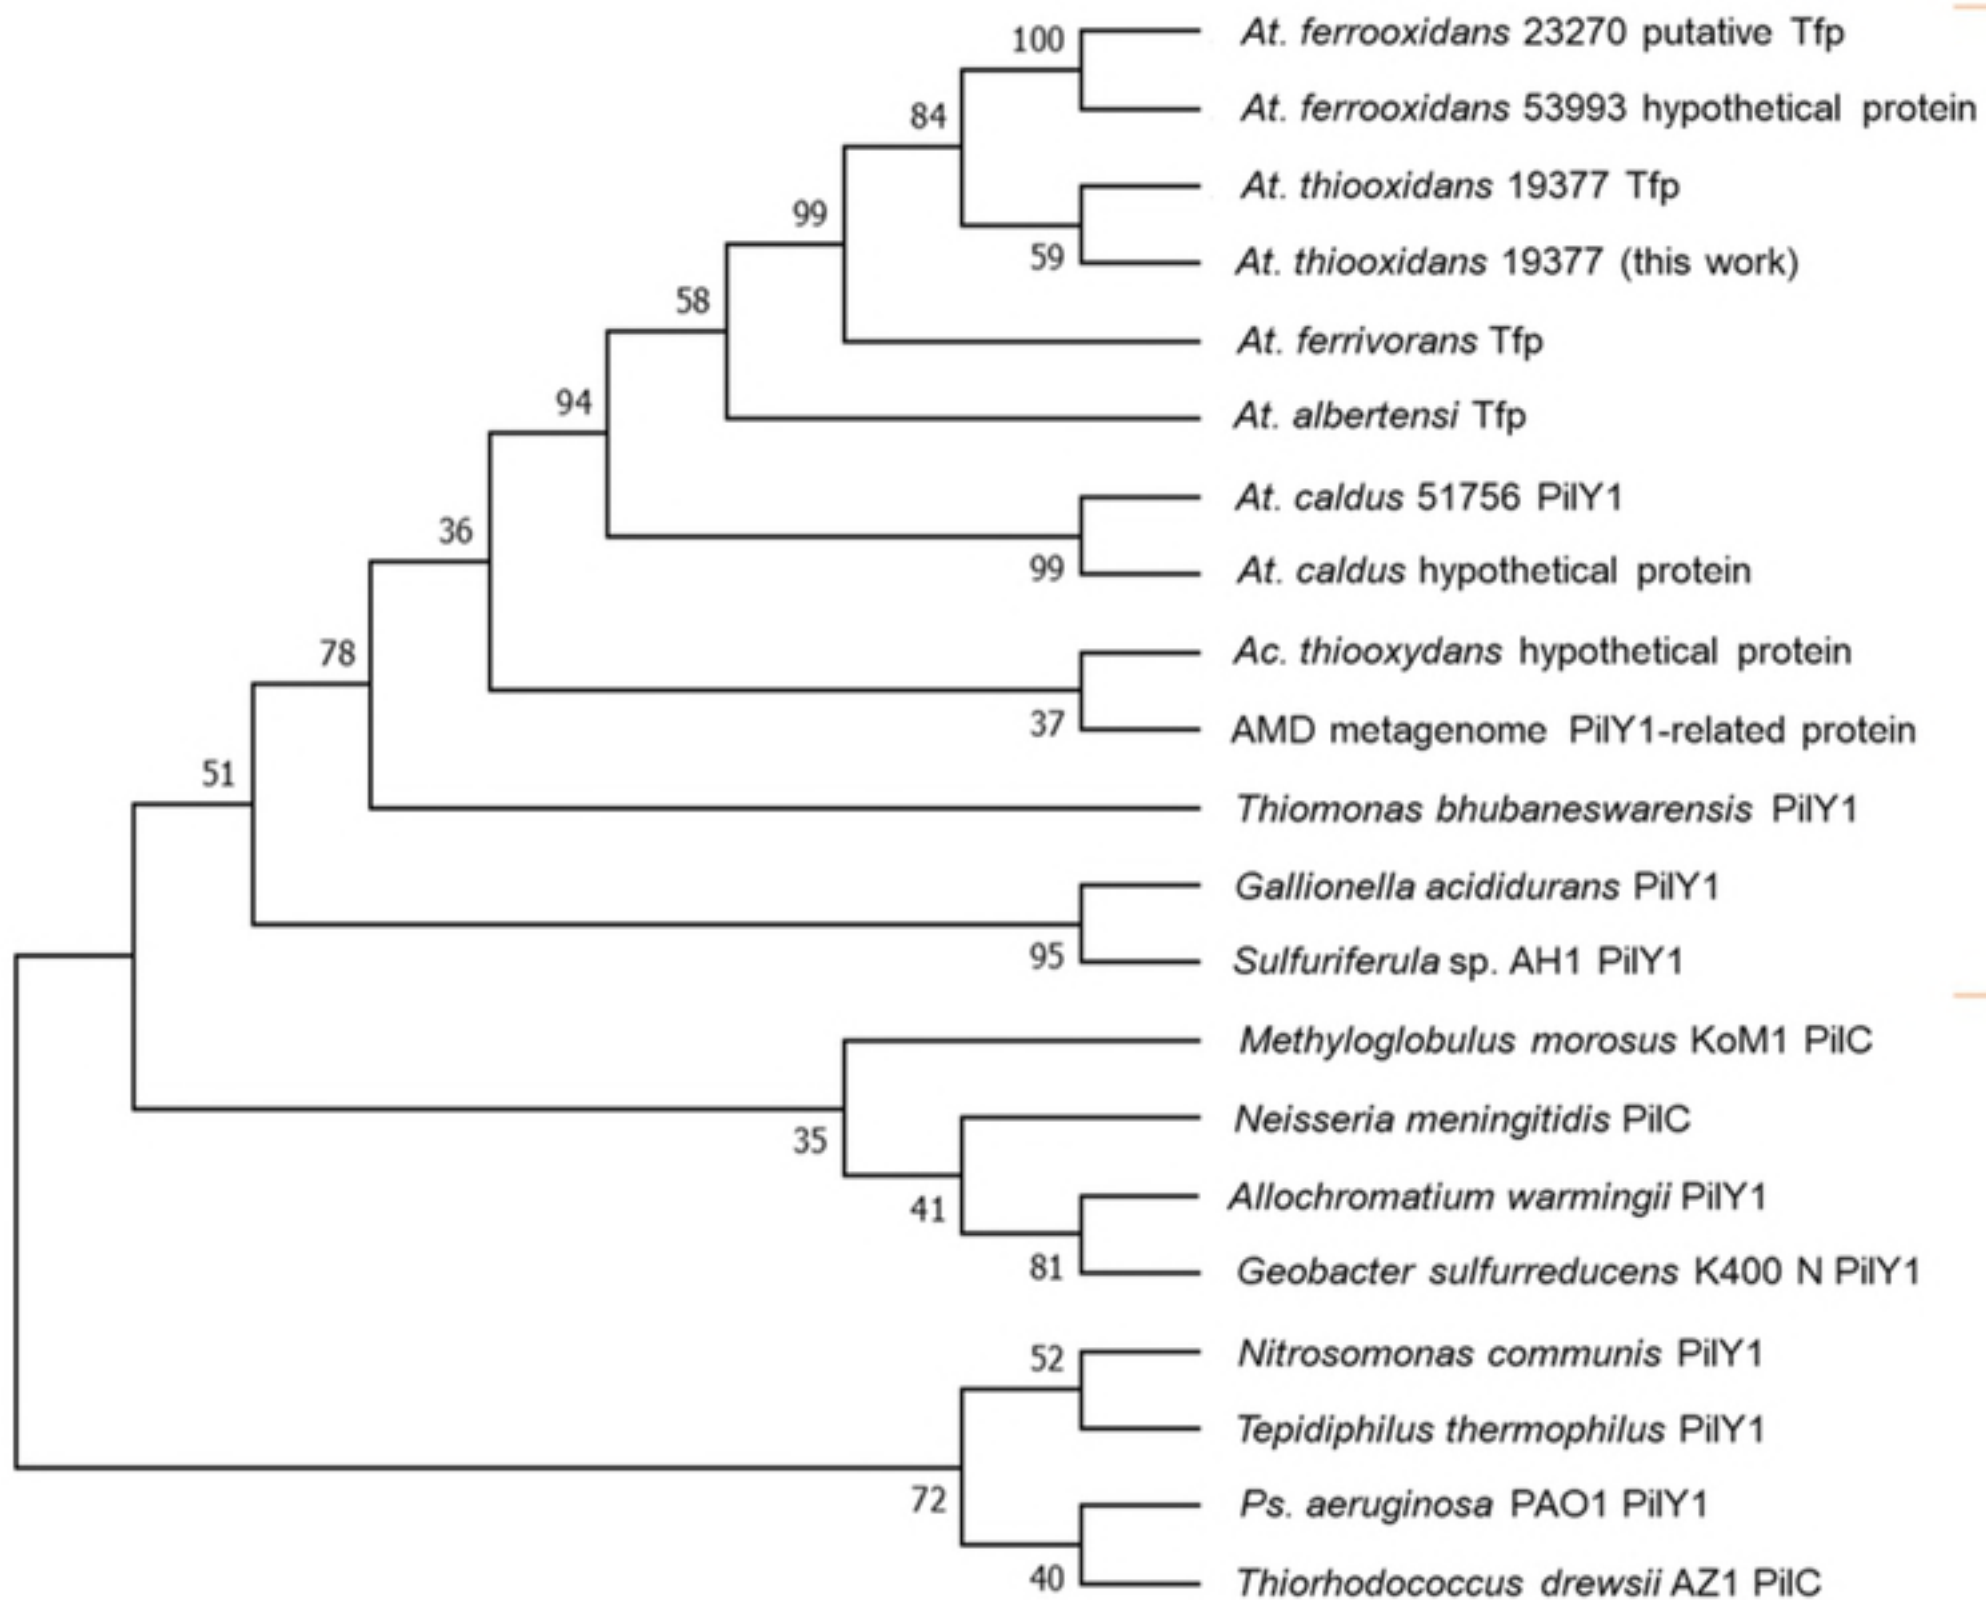

from AMD and/or mine tailings



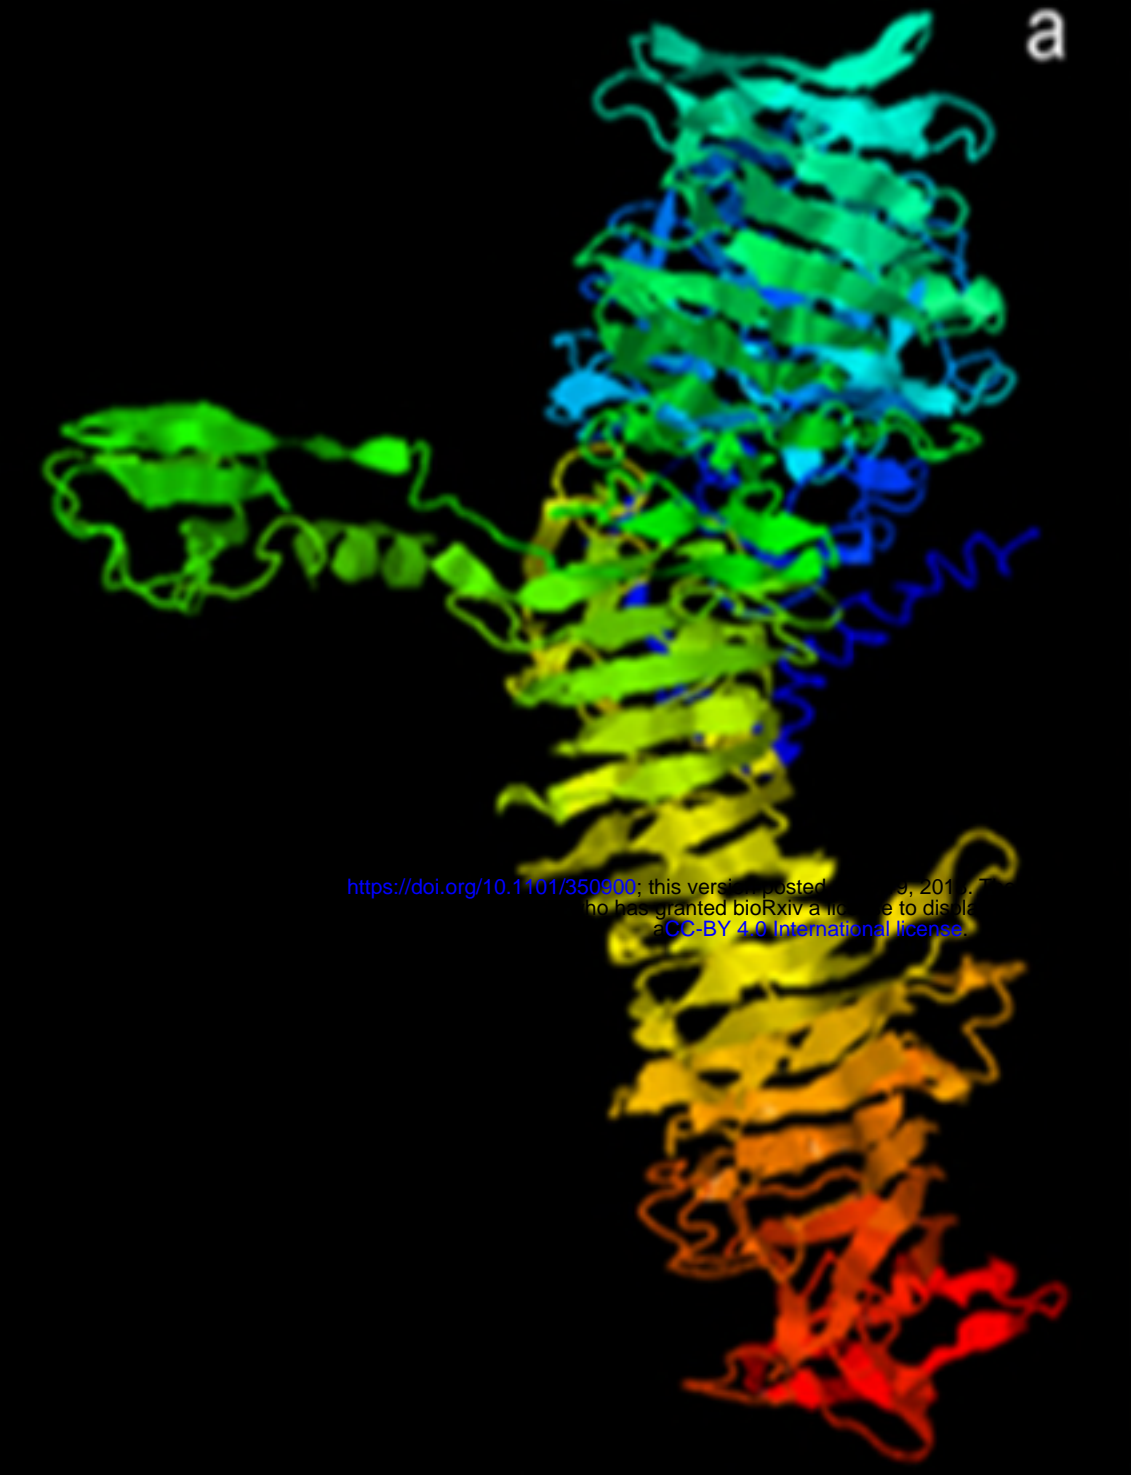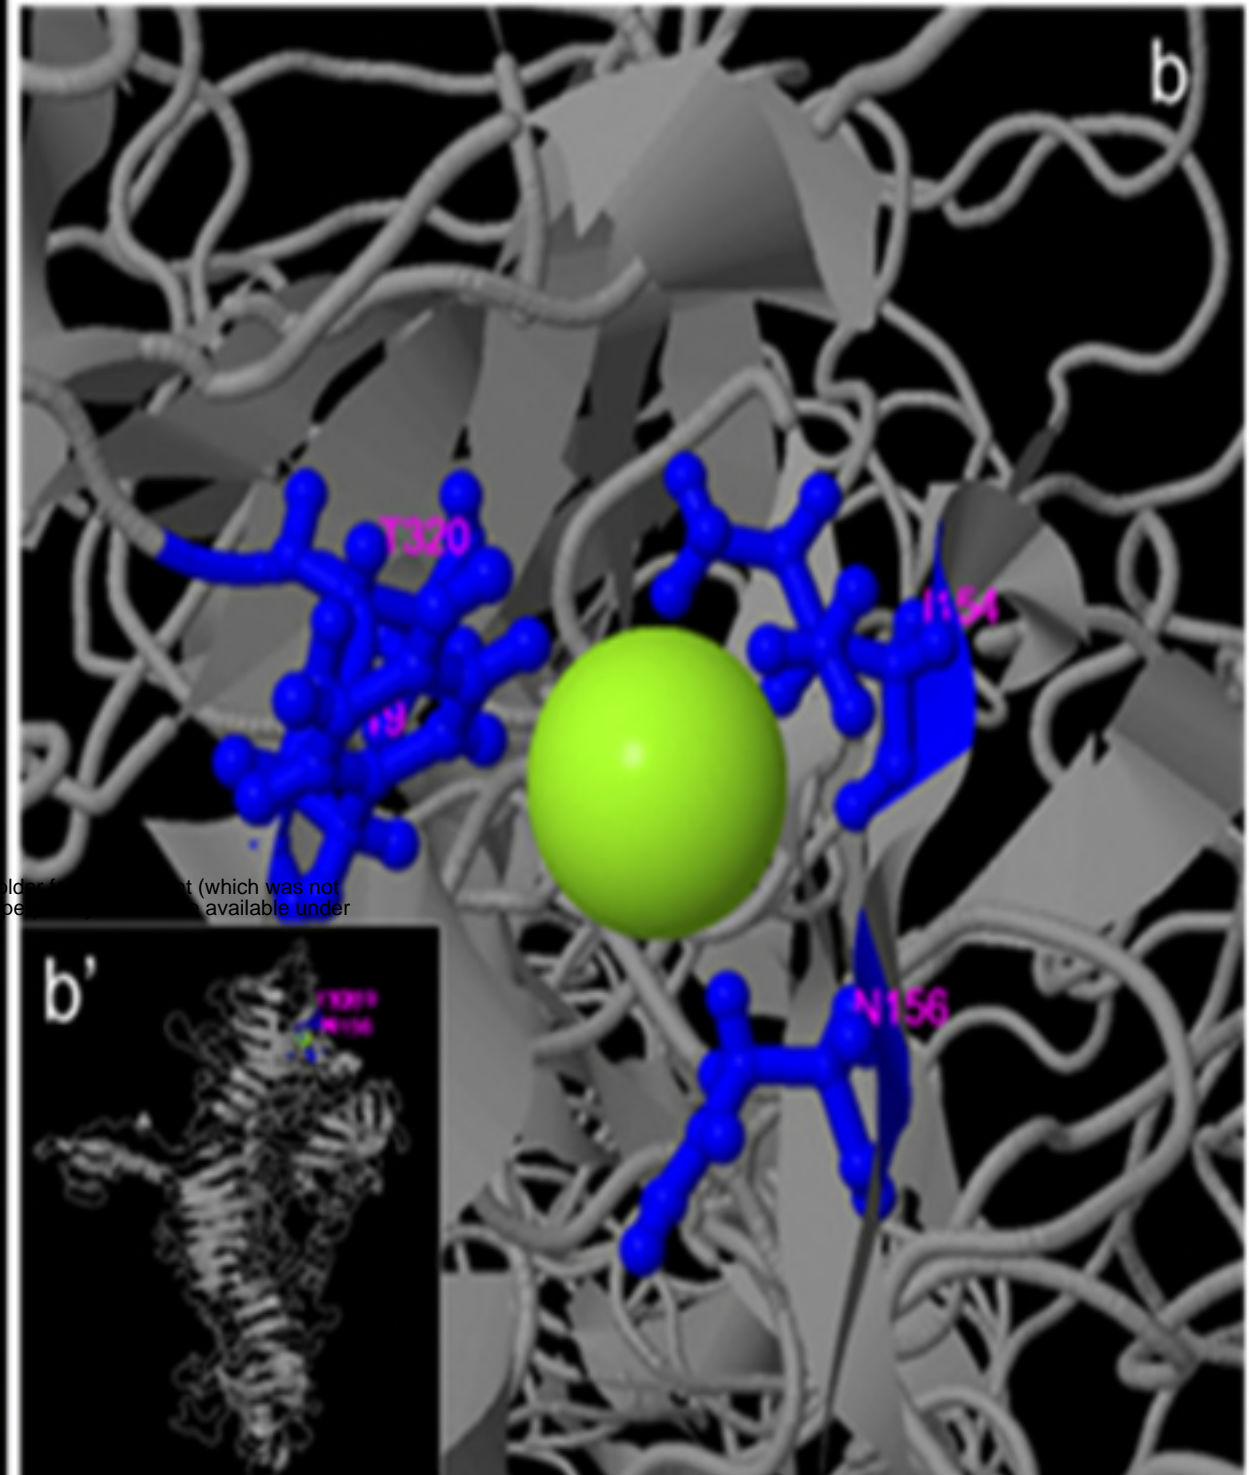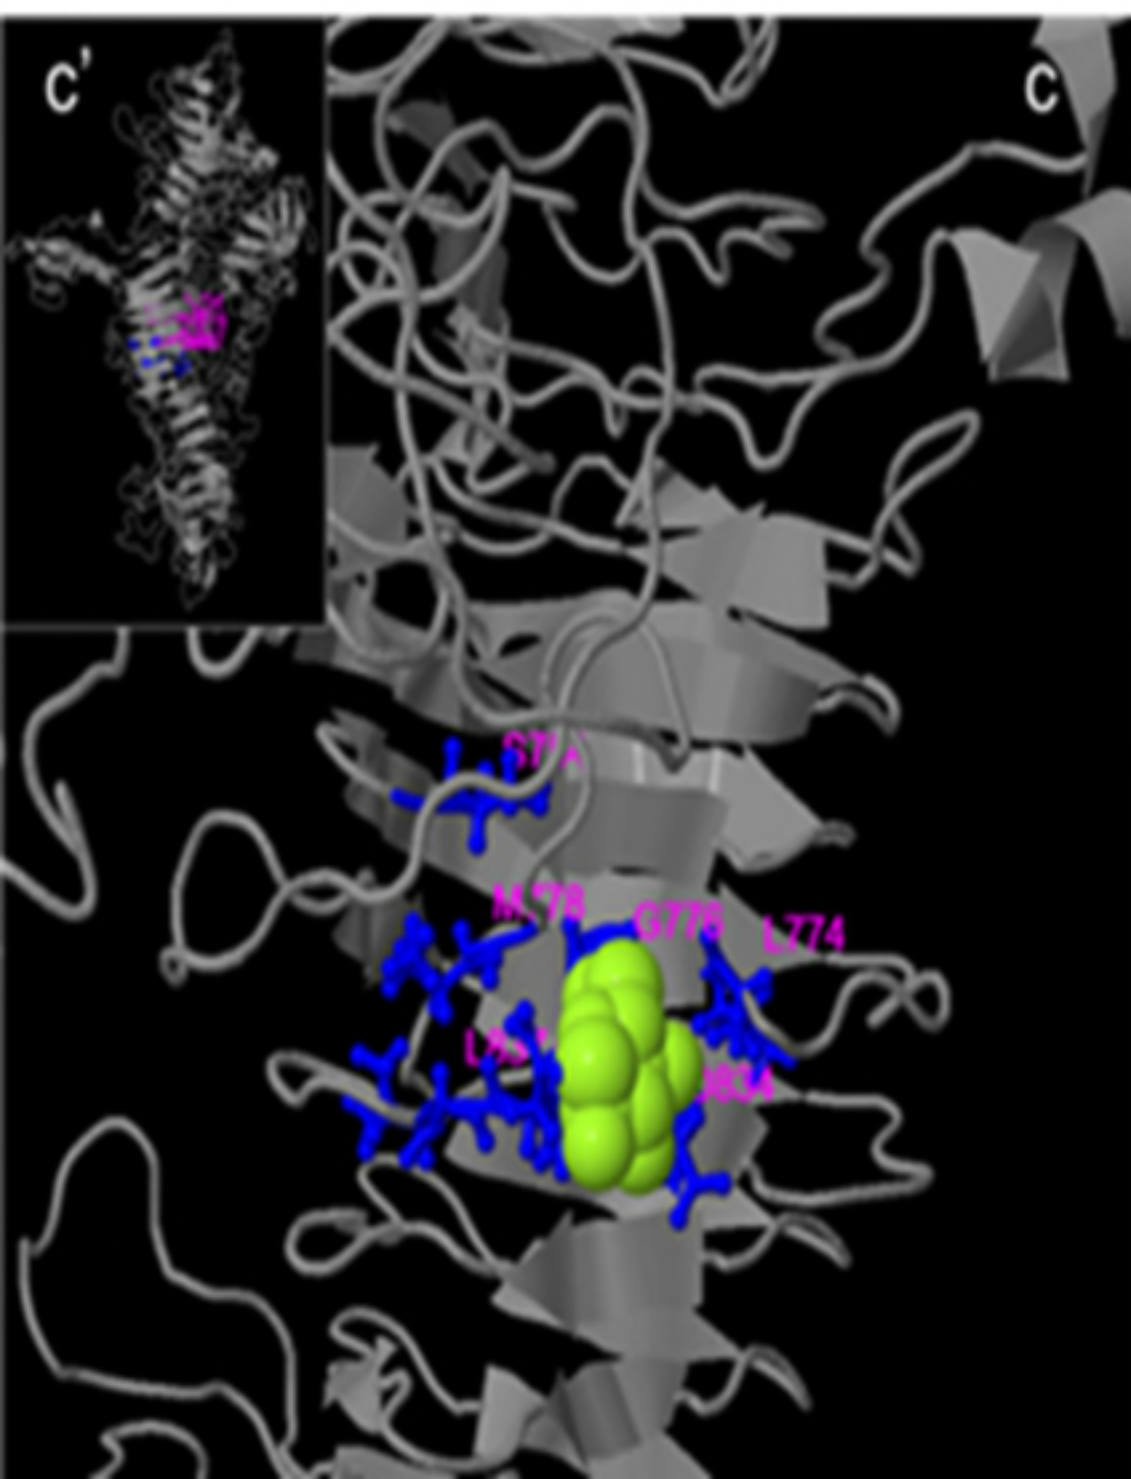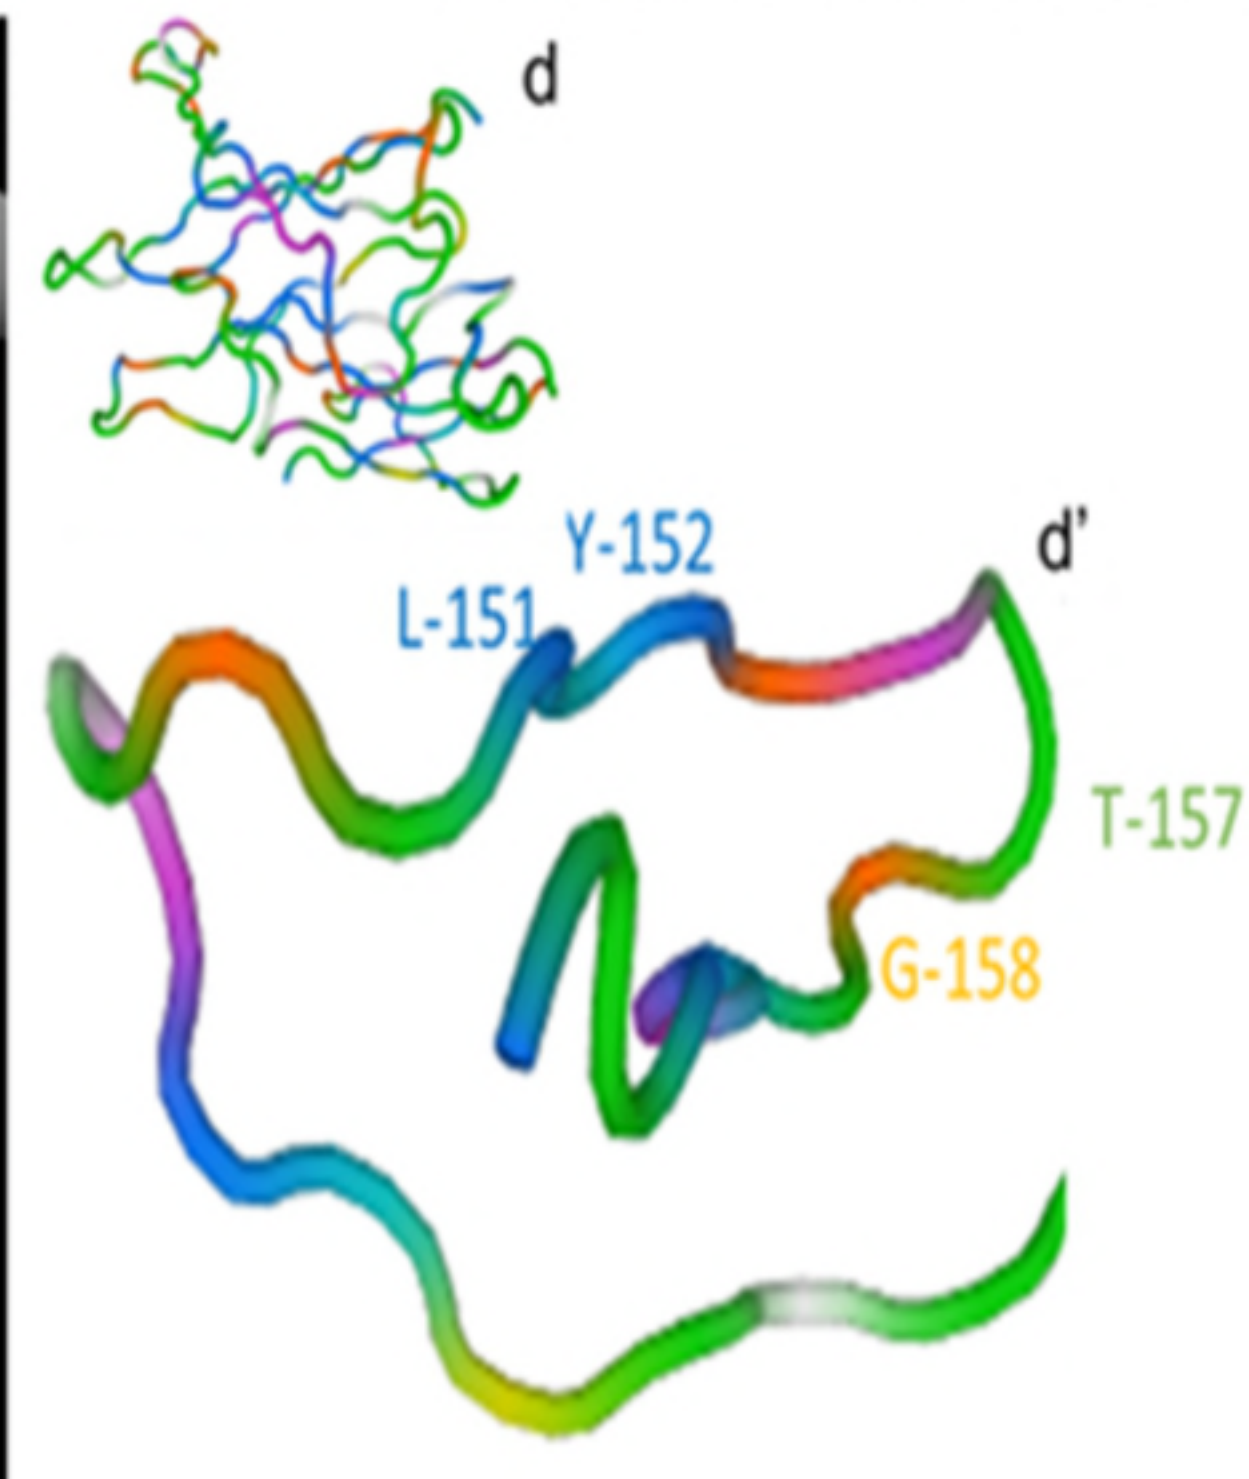

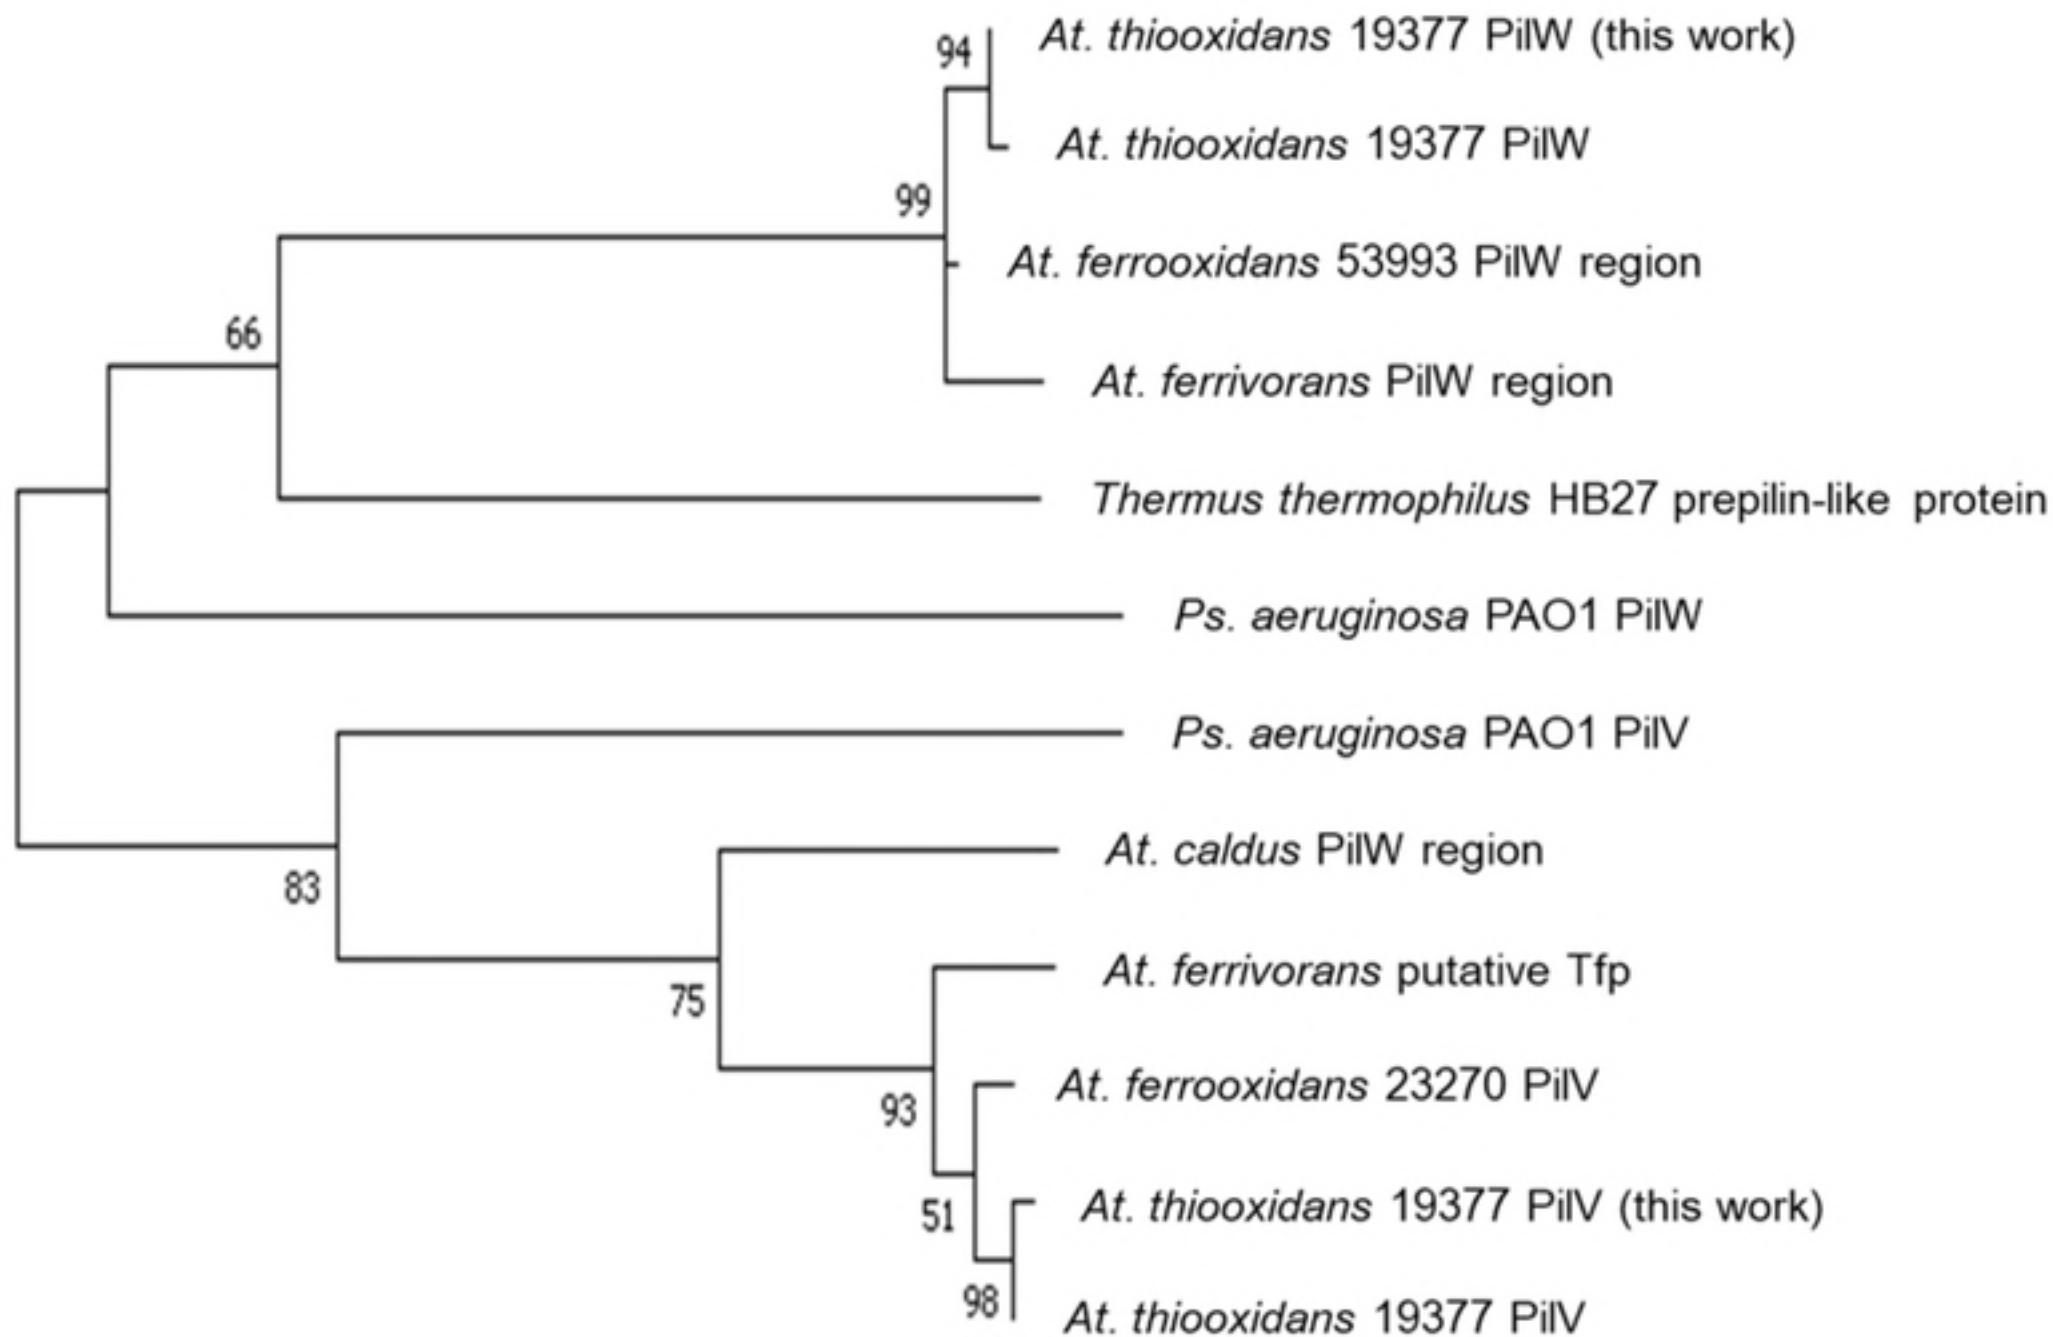

0.20
